# Supplementary material for: Mineral phosphorus drives glacier algal blooms on the Greenland Ice Sheet
Source: PubMed Central journal article supplement (PMC7835244; doi:10.1038/s41467-020-20627-w), 2021-01-25
Supplement: 41467_2020_20627_MOESM1_ESM.pdf [file 41467_2020_20627_MOESM1_ESM.pdf]

**Supplementary Information for**

MINERAL PHOSPHORUS DRIVES GLACIER ALGAL BLOOMS ON THE  
GREENLAND ICE SHEET

by McCUTCHEON *et al.*

Supplementary Notes 1 to 6  
Supplementary Figures 1 to 3  
Supplementary Tables 1 to 14  
Supplementary References

## Supplementary Notes

### Supplementary Note 1

It should be noted that while algal abundances increase with proximity to the ice sheet margin, our TOC data appear to demonstrate the opposite trend, with LAP TOC concentrations at sites 4 and 5 being slightly lower than those at sites 2 and 3. This discrepancy is likely a consequence of how algal counts (per unit volume of melted ice) and TOC (per unit mass of solids) were quantified, with the latter being dependent on the mass of mineral dust present at the ice surface. Sites 4 and 5 are within the spatial extent of the region of outcropping mineral dust (25), which may explain the slightly suppressed TOC values. The ratio of TOC:N:P<sub>org</sub> measured in the H<sub>bio</sub> LAP samples collected at Site 4 ranged between 690:48:1 and 2615:196:1.

### Supplementary Note 2

Total particulate mass loading for H<sub>bio</sub> ice ( $394 \pm 336 \mu\text{g}\cdot\text{mL}^{-1}$ , mean  $\pm$  SD, n=3) was used to calculate glacier algal cell abundance from the measured TOC and TN data (Supplementary Table 5). These values were used to calculate the average quantity of TOC ( $20.5 \mu\text{g}\cdot\text{mL}^{-1}$ ) and TN ( $0.8 \mu\text{g}\cdot\text{mL}^{-1}$ ) per volume of melted H<sub>bio</sub> ice sample. Glacier algal cell dimensions ( $29.60 \pm 7.61 \mu\text{m} \times 12.04 \pm 2.06 \mu\text{m}^1$ ) were used to calculate average cell volume ( $3370 \mu\text{m}^3$ ). This cell volume was used along with the TOC and TN per volume and the cell-nutrient conversion from Montagnes, et al. <sup>2</sup> to calculate glacier algal cells per mL. This calculation generated values of  $6.01 \times 10^4$  and  $1.18 \times 10^4 \text{ cells}\cdot\text{mL}^{-1}$  from TOC and TN respectively.

The glacier algal cell estimate from TOC was improved by accounting for the presence of black carbon and heterotrophic bacteria. From unpublished data, we know that black carbon accounts very little of the measured TOC, and not more than 5% of measured TOC in H<sub>bio</sub> ice samples. The TOC value per mL was therefore reduced by 5%. The average

heterotrophic bacteria cell abundance at Site 4 has been reported as  $3.3 \pm 0.3 \times 10^5 \text{ cell}\cdot\text{mL}^{-1}$ .<sup>13</sup> Using a hypothetical bacterial cell volume of  $1 \mu\text{m}^3$  and the bacteria-carbon calculation in Bratbak and Dundas<sup>4</sup>, we calculate that bacteria account for  $7.62 \times 10^{-2} \mu\text{g C}\cdot\text{mL}^{-1}$ , or 0.4% of the total TOC. After removing this quantity of carbon from the TOC the glacier algal cell estimate from TOC was recalculated to be  $5.63 \times 10^4 \text{ cell}\cdot\text{mL}^{-1}$ . The range of values reported in the main text ( $1.2\text{--}5.6 \times 10^4 \text{ cell}\cdot\text{mL}^{-1}$ ) refer to the estimates from TN and the adjusted TOC.

### **Supplementary Note 3**

Little to no inorganic carbon was detected in the samples through the TC/TOC analyses (Supplementary Table 5), suggesting the absence of carbonate minerals, a result that was corroborated by XRD (Supplementary Table 6). Low abundances of smectite phases detected in some samples were excluded from the quantitative refinement (Supplementary Table 6).  $H_{\text{bio}}$  ice dust contained higher abundances of framework silicates and lower abundances of single, double and phyllosilicate phases compared to DCC ice dust. The composition of dust in  $H_{\text{bio}}$  ice from site 4 in 2016 and 2017 were similar, with the exception that the 2017  $H_{\text{bio}}$  ice contained greater abundances of single chain silicates (pyroxene) and phyllosilicate phases (Supplementary Fig. 3a, Supplementary Table 7). The dust composition in  $H_{\text{bio}}$  ice exhibited a spatial trend across the ablation zone, which along with the corresponding meltwater fluid chemistry, provides an indication of mineral weathering processes.  $H_{\text{bio}}$  ice closer to the margin (Site 5) was enriched in framework silicates (90 wt%) and depleted in phyllo-, single chain, and double chain silicate phases (10 wt%) compared to inland  $H_{\text{bio}}$  ice (Site 2: 71 wt% and 29 wt%, respectively) (Supplementary Fig. 3a, details and statistics: Supplementary Table 7).

### **Supplementary Note 4**

By habitat, cation concentrations were higher in the 2016 samples (site 4a) than their 2017 (site 4b) counterparts, likely due to them being collected later in the melt season (Supplementary Fig. 3b). The 2017 samples contained higher concentrations of chloride than those collected in 2016 (Supplementary Table 6). Specifically, H<sub>bio</sub> and DCC ice at Site 4 contained higher concentrations of ions in solution than clean ice and supraglacial stream water, an occurrence that may be the product of mineral weathering by heterotrophic bacteria or fungi (Supplementary Fig. 3b). Solid phase P<sub>org</sub> concentrations did not correlate with P<sub>exch</sub> or aqueous P (Supplementary Fig. 2d,e).

### **Supplementary Note 5**

All communities showed a significantly higher similarity within one site (16S: R=0.720, p=0.001; 18S: R=0.446, p=0.001; ITS2: R=0.536, p=0.003) than within one habitat (16S: R=0.170, p=0.144; 18S: R=0.303, p=0.012; ITS2: R=0.207; p=0.102).

### **Supplementary Note 6**

All REE data were normalized (n) to the average elemental composition of the upper continental crust (UCC) given by Rudnick and Gao<sup>5</sup>. Europium anomaly was calculated as follows:

$$\text{Eu}/\text{Eu}^* = \text{Eu}_n / \sqrt{\text{Sm}_n \times \text{Gd}_n}$$

H<sub>bio</sub>, DCC, and CCH REE patterns exhibit preeminent positive Eu\*/Eu anomaly that make them distinct from distal sources such as Asian dusts from Northern China and the Taklamakan Desert<sup>6</sup> as well as African<sup>7</sup> dusts collected in the North Atlantic (Fig 6b). H<sub>bio</sub>, DCC, and CCH REE patterns correspond well with the REE signature of local sediments. Our LAP samples can be subdivided into two groups based on their concentration and pattern shape, thereby matching: (i) the signature of Qinguata Kuusua river sediment (the river that drains Kangerlussuaq fjord), and (ii) the average of local sediments in the catchment area<sup>8</sup>. Our REE results are consistent with the average REE signature measured in cryoconites

collected from a location near our sampling transect<sup>9</sup>. The rock samples collected in the Russel glacier forefeels, however, plot separately. This may indicate that rock weathering and diagenetic processes altered the REE patterns. Overall, our REE results indicate that local sources are the dominant input of the mineral dust in our LAP samples, and also demonstrate the variability in REE signature observed in local sediments and lithologies.

## Supplementary Tables

**Supplementary Table 1.** Locations, dates and sample types collected for particulate analyses. Sites 4a and 4b were the base camp locations for 2016 and 2017, respectively.

| Site                   | Distance to margin (km) | Location               | Date sampled         | Sample ID | Sample Type           |
|------------------------|-------------------------|------------------------|----------------------|-----------|-----------------------|
| 1                      | 130                     | N67.0006 W47.02575     | 2016-07-27           | GrIS16_1  | Clean snow            |
| 2                      | 75                      | N67.28250 W48.68000    | 2016-07-27           | GrIS16_2  | H <sub>bio</sub> ice  |
|                        |                         | N67.191389 W48.68250   | 2016-08-05           | GrIS16_9  | H <sub>bio</sub> ice  |
| 3                      | 50                      | N67.19222 W49.08000    | 2016-07-27           | GrIS16_3  | H <sub>bio</sub> ice  |
|                        |                         | N67.21583 W49.04250    | 2016-07-27           | GrIS16_4  | H <sub>bio</sub> snow |
|                        |                         | N67.21861 W49.15667    | 2016-08-05           | GrIS16_10 | H <sub>bio</sub> ice  |
|                        |                         | N67.22889 W49.12306    | 2016-08-05           | GrIS16_11 | H <sub>bio</sub> snow |
| 4a                     | 35                      | N67.195 W49.42056      | 2016-07-31           | GrIS16_5  | H <sub>bio</sub> ice  |
|                        |                         | N67.19722 W49.42917    | 2016-07-31           | GrIS16_6  | H <sub>bio</sub> ice  |
|                        |                         | N67.195 W49.42056      | 2016-08-01           | GrIS16_7  | H <sub>bio</sub> ice  |
|                        |                         | N67.19722 W49.429167   | 2016-08-01           | GrIS16_8  | H <sub>bio</sub> ice  |
|                        |                         | N67.26639 W49.35694    | 2016-07-30           | GrIS16_12 | Clean ice             |
|                        |                         | N67.26333 W49.35611    | 2016-07-30           | GrIS16_13 | DCC ice               |
|                        |                         | N67.26028 W49.35278    | 2016-07-30           | GrIS16_14 | H <sub>bio</sub> ice  |
|                        |                         | N67.1975 W49.47694     | 2016-08-01           | GrIS16_15 | Stream water          |
|                        |                         | N67.23778 W49.46861    | 2016-08-02           | GrIS16_16 | Clean ice             |
|                        |                         | N67.23778 W49.46861    | 2016-08-02           | GrIS16_17 | H <sub>bio</sub> ice  |
|                        |                         | N67.23778 W49.46861    | 2016-08-02           | GrIS16_18 | DCC ice               |
|                        |                         | N67.1975 W49.47694     | 2016-08-10           | GrIS16_23 | Stream water          |
|                        |                         | N67.22167 W49.59639    | 2016-08-14           | GrIS16_27 | Clean ice             |
|                        |                         | N67.22167 W49.59639    | 2016-08-14           | GrIS16_28 | H <sub>bio</sub> ice  |
| N67.22167 W49.60028    | 2016-08-14              | GrIS16_29              | DCC ice              |           |                       |
| N67.23861 W49.51139    | 2016-08-17              | GrIS16_30              | DCC ice              |           |                       |
| 4b                     | 35                      | N67.07822 W49.34330    | 2017-06-23           | GrIS17_24 | H <sub>bio</sub> ice  |
|                        |                         | N67.07601, W49.34902   | 2017-06-23           | GrIS17_25 | DCC ice               |
|                        |                         | N67.076392, W49.343453 | 2017-06-25           | GrIS17_26 | H <sub>bio</sub> ice  |
|                        |                         | N67.07515, W49.35309   | 2017-06-25           | GrIS17_27 | Cryoconite hole       |
|                        |                         | N67.076392, W49.343453 | 2017-06-27           | GrIS17_28 | H <sub>bio</sub> ice  |
|                        |                         | N67.07515, W49.35309   | 2017-06-27           | GrIS17_29 | Biofilm               |
|                        |                         | N67.07817, W49.33974   | 2017-06-20           | GRIS17_31 | CCH core layer        |
|                        |                         | N67.07515, W49.35309   | 2017-06-26           | GrIS17_33 | Clean ice             |
|                        |                         | N67.076392, W49.343453 | 2017-06-25           | GrIS17_34 | H <sub>bio</sub> ice  |
| N67.076392, W49.343453 | 2017-06-26              | GrIS17_35              | H <sub>bio</sub> ice |           |                       |
| 5                      | 33                      | N67.12556 W49.45500    | 2016-08-12           | GrIS16_24 | H <sub>bio</sub> ice  |
|                        |                         | N67.12694 W49.46833    | 2016-08-12           | GrIS16_25 | H <sub>bio</sub> ice  |
|                        |                         | N67.12444 W49.44778    | 2016-08-12           | GrIS16_26 | H <sub>bio</sub> ice  |
| 6                      |                         | N67.15347 W50.06095    | 2018-08-09           | Rock_J1   | Rock                  |

**Supplementary Table 2.** Results of a Tukey HSD test with a 95% family-wise confidence interval for  $F_v/F_m$  measurements made at 24 h and 120 h in the nutrient addition experiment.

| By treatment:                | difference | lower     | upper     | adjusted p - value |
|------------------------------|------------|-----------|-----------|--------------------|
| Control - ALL                | -0.048625  | -0.120219 | 0.022969  | 0.304554           |
| NH4 - ALL                    | -0.095875  | -0.167469 | -0.024281 | 0.004427           |
| NO3 - ALL                    | -0.077250  | -0.148844 | -0.005656 | 0.029443           |
| PO4 - ALL                    | 0.002250   | -0.069344 | 0.073844  | 0.999983           |
| NH4 - Control                | -0.047250  | -0.118844 | 0.024344  | 0.331902           |
| NO3 - Control                | -0.028625  | -0.100219 | 0.042969  | 0.773587           |
| PO4 - Control                | 0.050875   | -0.020719 | 0.122469  | 0.262936           |
| NO3 - NH4                    | 0.018625   | -0.052969 | 0.090219  | 0.941443           |
| PO4 - NH4                    | 0.098125   | 0.026531  | 0.169719  | 0.003481           |
| PO4 - NO3                    | 0.079500   | 0.007906  | 0.151094  | 0.023685           |
| By time:                     | difference | lower     | upper     | adjusted p - value |
| 120 h - 24 h                 | 0.083700   | 0.051819  | 0.115581  | 0.000008           |
| By treatment and time:       | difference | lower     | upper     | adjusted p - value |
| Control:24 h - ALL:24 h      | 0.020250   | -0.098821 | 0.139321  | 0.999849           |
| NH4:24 h - ALL:24 h          | -0.056000  | -0.175071 | 0.063071  | 0.835811           |
| NO3:24 h - ALL:24 h          | -0.046750  | -0.165821 | 0.072321  | 0.935807           |
| PO4:24 h - ALL:24 h          | 0.037500   | -0.081571 | 0.156571  | 0.983711           |
| ALL:120 h - ALL:24 h         | 0.153500   | 0.034429  | 0.272571  | 0.004269           |
| Control:120 h - ALL:24 h     | 0.036000   | -0.083071 | 0.155071  | 0.987647           |
| NH4:120 h - ALL:24 h         | 0.017750   | -0.101321 | 0.136821  | 0.999950           |
| NO3:120 h - ALL:24 h         | 0.045750   | -0.073321 | 0.164821  | 0.943315           |
| PO4:120 h - ALL:24 h         | 0.120500   | 0.001429  | 0.239571  | 0.045490           |
| NH4:24 h - Control:24 h      | -0.076250  | -0.195321 | 0.042821  | 0.487874           |
| NO3:24 h - Control:24 h      | -0.067000  | -0.186071 | 0.052071  | 0.656808           |
| PO4:24 h - Control:24 h      | 0.017250   | -0.101821 | 0.136321  | 0.999961           |
| ALL:120 h - Control:24 h     | 0.133250   | 0.014179  | 0.252321  | 0.018914           |
| Control:120 h - Control:24 h | 0.015750   | -0.103321 | 0.134821  | 0.999982           |
| NH4:120 h - Control:24 h     | -0.002500  | -0.121571 | 0.116571  | 1.000000           |
| NO3:120 h - Control:24 h     | 0.025500   | -0.093571 | 0.144571  | 0.999035           |
| PO4:120 h - Control:24 h     | 0.100250   | -0.018821 | 0.219321  | 0.158238           |
| NO3:24 h - NH4:24 h          | 0.009250   | -0.109821 | 0.128321  | 1.000000           |
| PO4:24 h - NH4:24 h          | 0.093500   | -0.025571 | 0.212571  | 0.227254           |
| ALL:120 h - NH4:24 h         | 0.209500   | 0.090429  | 0.328571  | 0.000054           |
| Control:120 h - NH4:24 h     | 0.092000   | -0.027071 | 0.211071  | 0.245213           |
| NH4:120 h - NH4:24 h         | 0.073750   | -0.045321 | 0.192821  | 0.533121           |
| NO3:120 h - NH4:24 h         | 0.101750   | -0.017321 | 0.220821  | 0.145409           |
| PO4:120 h - NH4:24 h         | 0.176500   | 0.057429  | 0.295571  | 0.000725           |
| PO4:24 h - NO3:24 h          | 0.084250   | -0.034821 | 0.203321  | 0.353243           |
| ALL:120 h - NO3:24 h         | 0.200250   | 0.081179  | 0.319321  | 0.000112           |
| Control:120 h - NO3:24 h     | 0.082750   | -0.036321 | 0.201821  | 0.376932           |
| NH4:120 h - NO3:24 h         | 0.064500   | -0.054571 | 0.183571  | 0.701320           |
| NO3:120 h - NO3:24 h         | 0.092500   | -0.026571 | 0.211571  | 0.239118           |
| PO4:120 h - NO3:24 h         | 0.167250   | 0.048179  | 0.286321  | 0.001489           |
| ALL:120 h - PO4:24 h         | 0.116000   | -0.003071 | 0.235071  | 0.061082           |
| Control:120 h - PO4:24 h     | -0.001500  | -0.120571 | 0.117571  | 1.000000           |
| NH4:120 h - PO4:24 h         | -0.019750  | -0.138821 | 0.099321  | 0.999878           |
| NO3:120 h - PO4:24 h         | 0.008250   | -0.110821 | 0.127321  | 1.000000           |
| PO4:120 h - PO4:24 h         | 0.083000   | -0.036071 | 0.202071  | 0.372927           |
| Control:120 h - ALL:120 h    | -0.117500  | -0.236571 | 0.001571  | 0.055421           |
| NH4:120 h - ALL:120 h        | -0.135750  | -0.254821 | -0.016679 | 0.015824           |
| NO3:120 h - ALL:120 h        | -0.107750  | -0.226821 | 0.011321  | 0.102284           |
| PO4:120 h - ALL:120 h        | -0.033000  | -0.152071 | 0.086071  | 0.993286           |

|                           |           |           |          |          |
|---------------------------|-----------|-----------|----------|----------|
| NH4:120 h - Control:120 h | -0.018250 | -0.137321 | 0.100821 | 0.999937 |
| NO3:120 h - Control:120 h | 0.009750  | -0.109321 | 0.128821 | 1.000000 |
| PO4:120 h - Control:120 h | 0.084500  | -0.034571 | 0.203571 | 0.349376 |
| NO3:120 h - NH4:120 h     | 0.028000  | -0.091071 | 0.147071 | 0.998010 |
| PO4:120 h - NH4:120 h     | 0.102750  | -0.016321 | 0.221821 | 0.137332 |
| PO4:120 h - NO3:120 h     | 0.074750  | -0.044321 | 0.193821 | 0.514912 |

**Supplementary Table 3.** Results of a Tukey HSD test with a 95% family-wise confidence interval for  $rETR_{max}$  measurements made at 24 h and 120 h in the nutrient addition experiment.

| By treatment:                | difference | lower       | upper      | adjusted p - value |
|------------------------------|------------|-------------|------------|--------------------|
| Control - ALL                | -54.187704 | -96.368800  | -12.006610 | 0.006686           |
| NH4 - ALL                    | -88.229365 | -130.410460 | -46.048271 | 0.000011           |
| NO3 - ALL                    | -66.073683 | -108.254780 | -23.892590 | 0.000750           |
| PO4 - ALL                    | 7.534635   | -34.646460  | 49.715729  | 0.984855           |
| NH4 - Control                | -34.041661 | -76.222750  | 8.139433   | 0.160147           |
| NO3 - Control                | -11.885979 | -54.067070  | 30.295114  | 0.923211           |
| PO4 - Control                | 61.722339  | 19.541250   | 103.903433 | 0.001695           |
| NO3 - NH4                    | 22.155682  | -20.025410  | 64.336775  | 0.555853           |
| PO4 - NH4                    | 95.764000  | 53.582910   | 137.945093 | 0.000003           |
| PO4 - NO3                    | 73.608318  | 31.427220   | 115.789412 | 0.000179           |
| By time:                     | difference | lower       | upper      | adjusted p - value |
| 120 h - 24 h                 | 54.464760  | 35.681430   | 73.248080  | 0.000002           |
| By treatment and time:       | difference | lower       | upper      | adjusted p - value |
| Control:24 h - ALL:24 h      | -0.220758  | -70.374175  | 69.932660  | 1.000000           |
| NH4:24 h - ALL:24 h          | -43.666315 | -113.819732 | 26.487100  | 0.526468           |
| NO3:24 h - ALL:24 h          | -29.824681 | -99.978098  | 40.328740  | 0.900679           |
| PO4:24 h - ALL:24 h          | 32.396540  | -37.756877  | 102.549960 | 0.849410           |
| ALL:120 h - ALL:24 h         | 118.321120 | 48.167703   | 188.474540 | 0.000107           |
| Control:120 h - ALL:24 h     | 10.166470  | -59.986947  | 80.319890  | 0.999961           |
| NH4:120 h - ALL:24 h         | -14.471294 | -84.624711  | 55.682120  | 0.999282           |
| NO3:120 h - ALL:24 h         | 15.998435  | -54.154982  | 86.151850  | 0.998427           |
| PO4:120 h - ALL:24 h         | 100.993851 | 30.840434   | 171.147270 | 0.001078           |
| NH4:24 h - Control:24 h      | -43.445558 | -113.598974 | 26.707860  | 0.533306           |
| NO3:24 h - Control:24 h      | -29.603923 | -99.757340  | 40.549490  | 0.904507           |
| PO4:24 h - Control:24 h      | 32.617298  | -37.536119  | 102.770710 | 0.844454           |
| ALL:120 h - Control:24 h     | 118.541878 | 48.388461   | 188.695290 | 0.000104           |
| Control:120 h - Control:24 h | 10.387228  | -59.766189  | 80.540640  | 0.999953           |
| NH4:120 h - Control:24 h     | -14.250536 | -84.403953  | 55.902880  | 0.999364           |
| NO3:120 h - Control:24 h     | 16.219193  | -53.934224  | 86.372610  | 0.998252           |
| PO4:120 h - Control:24 h     | 101.214609 | 31.061192   | 171.368030 | 0.001047           |
| NO3:24 h - NH4:24 h          | 13.841634  | -56.311783  | 83.995050  | 0.999496           |
| PO4:24 h - NH4:24 h          | 76.062855  | 5.909438    | 146.216270 | 0.025322           |
| ALL:120 h - NH4:24 h         | 161.987435 | 91.834018   | 232.140850 | 0.000000           |
| Control:120 h - NH4:24 h     | 53.832786  | -16.320631  | 123.986200 | 0.253045           |
| NH4:120 h - NH4:24 h         | 29.195021  | -40.958395  | 99.348440  | 0.911353           |
| NO3:120 h - NH4:24 h         | 59.664750  | -10.488667  | 129.818170 | 0.149432           |
| PO4:120 h - NH4:24 h         | 144.660166 | 74.506749   | 214.813580 | 0.000003           |
| PO4:24 h - NO3:24 h          | 62.221221  | -7.932196   | 132.374640 | 0.116253           |
| ALL:120 h - NO3:24 h         | 148.145801 | 77.992384   | 218.299220 | 0.000002           |
| Control:120 h - NO3:24 h     | 39.991151  | -30.162266  | 110.144570 | 0.640908           |
| NH4:120 h - NO3:24 h         | 15.353387  | -54.800030  | 85.506800  | 0.998856           |
| NO3:120 h - NO3:24 h         | 45.823116  | -24.330301  | 115.976530 | 0.460822           |
| PO4:120 h - NO3:24 h         | 130.818532 | 60.665115   | 200.971950 | 0.000020           |
| ALL:120 h - PO4:24 h         | 85.924580  | 15.771163   | 156.078000 | 0.007577           |
| Control:120 h - PO4:24 h     | -22.230070 | -92.383487  | 47.923350  | 0.983028           |
| NH4:120 h - PO4:24 h         | -46.867834 | -117.021251 | 23.285580  | 0.430078           |
| NO3:120 h - PO4:24 h         | -16.398105 | -86.551522  | 53.755310  | 0.998099           |
| PO4:120 h - PO4:24 h         | 68.597311  | -1.556106   | 138.750730 | 0.059409           |

|                           |             |             |            |          |
|---------------------------|-------------|-------------|------------|----------|
| Control:120 h - ALL:120 h | -108.154650 | -178.308067 | -38.001230 | 0.000417 |
| NH4:120 h - ALL:120 h     | -132.792414 | -202.945831 | -62.639000 | 0.000016 |
| NO3:120 h - ALL:120 h     | -102.322685 | -172.476102 | -32.169270 | 0.000904 |
| PO4:120 h - ALL:120 h     | -17.327269  | -87.480686  | 52.826150  | 0.997114 |
| NH4:120 h - Control:120 h | -24.637764  | -94.791181  | 45.515650  | 0.967020 |
| NO3:120 h - Control:120 h | 5.831965    | -64.321452  | 75.985380  | 1.000000 |
| PO4:120 h - Control:120 h | 90.827380   | 20.673964   | 160.980800 | 0.004061 |
| NO3:120 h - NH4:120 h     | 30.469729   | -39.683688  | 100.623150 | 0.888969 |
| PO4:120 h - NH4:120 h     | 115.465145  | 45.311728   | 185.618560 | 0.000157 |
| PO4:120 h - NO3:120 h     | 84.995416   | 14.841999   | 155.148830 | 0.008515 |



**Supplementary Table 4. Glacier algal cell concentrations (cells·mL<sup>-1</sup>) at the end of the 120 h nutrient incubation experiment. Glacier algae assemblage used for the incubations had an initial mean cell concentration of  $8.0 \pm 2.1 \times 10^3$  cells·mL<sup>-1</sup>.**

|                           | Control            | +NH <sub>4</sub> <sup>+</sup> | +NO <sub>3</sub> <sup>-</sup> | +PO <sub>4</sub> <sup>3-</sup> | +ALL               |                    |
|---------------------------|--------------------|-------------------------------|-------------------------------|--------------------------------|--------------------|--------------------|
| <b>Replicate</b>          | <b>1</b>           | $6.75 \times 10^3$            | $5.95 \times 10^3$            | $6.00 \times 10^3$             | $9.20 \times 10^3$ | $5.70 \times 10^3$ |
|                           | <b>2</b>           | $6.95 \times 10^3$            | $5.70 \times 10^3$            | $8.05 \times 10^3$             | $6.30 \times 10^3$ | $6.55 \times 10^3$ |
|                           | <b>3</b>           | $8.25 \times 10^3$            | $6.50 \times 10^3$            | $5.65 \times 10^3$             | $8.95 \times 10^3$ | $5.45 \times 10^3$ |
|                           | <b>4</b>           | $6.30 \times 10^3$            | $5.95 \times 10^3$            | $5.55 \times 10^3$             | $6.00 \times 10^3$ | $8.65 \times 10^3$ |
| <b>Mean</b>               | $7.06 \times 10^3$ | $6.03 \times 10^3$            | $6.31 \times 10^3$            | $7.61 \times 10^3$             | $6.59 \times 10^3$ |                    |
| <b>Standard deviation</b> | $8.37 \times 10^2$ | $3.38 \times 10^2$            | $1.17 \times 10^3$            | $1.70 \times 10^3$             | $1.45 \times 10^3$ |                    |
| <b>Standard error</b>     | $4.19 \times 10^2$ | $1.69 \times 10^2$            | $5.87 \times 10^2$            | $8.48 \times 10^2$             | $7.27 \times 10^2$ |                    |

**Supplementary Table 5. Carbon, nitrogen, and phosphorus content of solid LAPs collected from melted surface ice.**

| Site | Sample ID   | Sample type           | Carbon and nitrogen (wt%) |       |       |      | Carbon, nitrogen, and phosphorus (mol·g <sup>-1</sup> of solids) |                        |                   |                  |                  | Nutrient ratios (mol·g <sup>-1</sup> ) |        |       |
|------|-------------|-----------------------|---------------------------|-------|-------|------|------------------------------------------------------------------|------------------------|-------------------|------------------|------------------|----------------------------------------|--------|-------|
|      |             |                       | TC %                      | TOC % | TIC % | TN % | TOC mol·g <sup>-1</sup>                                          | TN mol·g <sup>-1</sup> | P <sub>exch</sub> | P <sub>min</sub> | P <sub>org</sub> | C:N                                    | C:P    | N:P   |
| 2    | GrIS-16_2   | H <sub>bio</sub> ice  | 8.45                      | 7.84  | 0.61  | 0.87 | 0.0065                                                           | 6.21E-04               | 5.10E-08          | 2.27E-06         | 1.20E-05         | 10.5                                   | 543.4  | 51.7  |
|      | GrIS-16_3   | H <sub>bio</sub> ice  | 7.19                      | 6.99  | 0.20  | 0.72 | 0.0058                                                           | 5.14E-04               | 2.97E-07          | 1.97E-06         | 1.06E-05         | 11.3                                   | 549.4  | 48.5  |
| 3    | GrIS-16_10  | H <sub>bio</sub> ice  | 5.61                      | 5.62  | -0.01 | 0.57 | 0.0047                                                           | 4.07E-04               | 2.78E-07          | 1.10E-06         | 8.62E-06         | 11.5                                   | 542.6  | 47.2  |
|      | GrIS-16_11  | H <sub>bio</sub> snow | 6.72                      | 5.80  | 0.92  | 0.60 | 0.0048                                                           | 4.28E-04               | 2.41E-06          | 1.29E-06         | 5.49E-06         | 11.3                                   | 879.6  | 78.0  |
| 4a   | GrIS-16_5   | H <sub>bio</sub> ice  | 4.27                      | 3.62  | 0.65  | 0.34 | 0.0030                                                           | 2.43E-04               | 8.58E-07          | 2.93E-07         | 2.10E-06         | 12.4                                   | 1436.0 | 115.6 |
|      | GrIS-16_6   | H <sub>bio</sub> ice  | 4.54                      | 4.30  | 0.24  | 0.40 | 0.0036                                                           | 2.86E-04               | 8.96E-07          | 4.10E-07         | 3.52E-06         | 12.5                                   | 1017.6 | 81.1  |
|      | GrIS-16_13  | DCC ice               | 8.07                      | 7.27  | 0.80  | 0.71 | 0.0061                                                           | 5.07E-04               | 3.52E-07          | 1.83E-06         | 8.60E-06         | 11.9                                   | 703.8  | 58.9  |
|      | GrIS-16_14  | H <sub>bio</sub> ice  | 2.59                      | 2.42  | 0.17  | 0.20 | 0.0020                                                           | 1.43E-04               | 6.04E-07          | 2.22E-07         | 1.85E-06         | 14.1                                   | 1087.1 | 77.0  |
|      | GrIS-16_17a | H <sub>bio</sub> ice  | 6.44                      | 6.69  | -0.25 | 0.55 | 0.0056                                                           | 3.93E-04               | 1.80E-07          | 1.39E-06         | 8.07E-06         | 14.2                                   | 690.5  | 48.7  |
|      | GrIS-16_17b | H <sub>bio</sub> ice  | 6.74                      | 6.25  | 0.49  | 0.58 | 0.0052                                                           | 4.14E-04               | 2.27E-07          | 1.34E-06         | 6.96E-06         | 12.6                                   | 747.3  | 59.4  |
|      | GrIS-16_18a | DCC ice               | 6.36                      | 5.80  | 0.56  | 0.54 | 0.0048                                                           | 3.85E-04               |                   |                  |                  | 12.5                                   |        |       |
|      | GrIS-16_18b | DCC ice               | 6.33                      | 6.13  | 0.20  | 0.54 | 0.0051                                                           | 3.85E-04               |                   |                  |                  | 13.2                                   |        |       |
|      | GrIS-16_28  | H <sub>bio</sub> ice  | 3.12                      | 3.17  | -0.05 | 0.25 | 0.0026                                                           | 1.78E-04               |                   |                  |                  | 14.8                                   |        |       |
|      | GrIS-16_29  | DCC ice               | 7.48                      | 4.78  | 2.70  | 0.62 | 0.0040                                                           | 4.43E-04               | 6.58E-07          | 7.96E-07         | 5.08E-06         | 9.0                                    | 783.0  | 87.1  |
| 4b   | GRIS-17-24  | H <sub>bio</sub> ice  |                           | 8.0   |       | 0.7  | 0.0067                                                           | 4.89E-04               | 1.47E-06          | 7.38E-07         | 2.55E-06         | 13.6                                   | 2614.9 | 192.1 |
|      | GRIS-17-25  | DCC ice               |                           | 3.7   |       | 0.4  | 0.0031                                                           | 2.72E-04               | 4.41E-07          | 5.74E-07         | 3.82E-06         | 11.4                                   | 814.0  | 71.2  |
|      | GRIS-17-27  | Cryoconite hole       |                           | 6.6   |       | 0.6  | 0.0055                                                           | 4.33E-04               | 2.31E-07          | 1.14E-06         | 8.43E-06         | 12.7                                   | 652.7  | 51.3  |

|   |            |                      |      |      |      |      |        |          |          |          |          |      |        |       |  |  |  |  |  |  |
|---|------------|----------------------|------|------|------|------|--------|----------|----------|----------|----------|------|--------|-------|--|--|--|--|--|--|
|   | GrIS-17-29 | Biofilm              |      | 8.1  |      |      |        |          |          |          |          |      |        |       |  |  |  |  |  |  |
|   | GRIS-17-34 | H <sub>bio</sub> ice |      | 5.5  |      | 0.6  | 0.0046 | 4.58E-04 | 5.20E-07 | 5.88E-07 | 2.89E-06 | 10.0 | 1582.8 | 158.3 |  |  |  |  |  |  |
| 5 | GrIS-16_24 | H <sub>bio</sub> ice | 4.85 | 4.26 | 0.59 | 0.29 | 0.0035 | 2.07E-04 | 1.69E-07 | 2.38E-07 | 1.51E-06 | 17.1 | 2356.0 | 137.5 |  |  |  |  |  |  |
|   | GrIS-16_26 | H <sub>bio</sub> ice | 3.69 | 3.10 | 0.59 | 0.24 | 0.0026 | 1.71E-04 |          |          |          |      |        |       |  |  |  |  |  |  |

TC: total carbon, TOC: total organic carbon, IC: inorganic carbon, P<sub>exch</sub>: exchangeable/loosely bound phosphorus, P<sub>min</sub>: mineral phosphorus, P<sub>org</sub>: organic phosphorus

**Supplementary Table 6.** Mineral phase abundances in 2016 and 2017 particulate samples as determined by Rietveld refinement with powder X-ray diffraction data. Abundances given as weight percent of total mineral dust (n=20).

| Year                | 2016                 | 2016                 | 2016                 | 2016                 | 2016                 | 2016                 | 2016                 | 2016                 | 2016    | 2016    | 2016    | 2016    | 2017                 | 2017                 | 2017                 | 2017                 | 2017    | 2017    | 2017     | 2016                 |   |
|---------------------|----------------------|----------------------|----------------------|----------------------|----------------------|----------------------|----------------------|----------------------|---------|---------|---------|---------|----------------------|----------------------|----------------------|----------------------|---------|---------|----------|----------------------|---|
| Sample ID           | 16-2                 | 16-3                 | 16-10                | 16-5                 | 16-6                 | 16-14                | 16-17                | 16-28                | 13c     | 16-18   | 16-29   | 16-30   | 17-24                | 17-26                | 17-28                | 17-34                | 17-35   | 17-27   | 17-29    | 16-24                |   |
| Site                | 2                    | 3                    | 3                    | 4a                   | 4a                   | 4a                   | 4a                   | 4a                   | 4a      | 4a      | 4a      | 4a      | 4b                   | 4b                   | 4b                   | 4b                   | 4b      | 4b      | 4b       | 4b                   | 5 |
| Surface habitat     | H <sub>bio</sub> ice | H <sub>bio</sub> ice | H <sub>bio</sub> ice | H <sub>bio</sub> ice | H <sub>bio</sub> ice | H <sub>bio</sub> ice | H <sub>bio</sub> ice | H <sub>bio</sub> ice | DCC ice | DCC ice | DCC ice | DCC ice | H <sub>bio</sub> ice | H <sub>bio</sub> ice | H <sub>bio</sub> ice | H <sub>bio</sub> ice | DCC ice | CC Hole | Bio-film | H <sub>bio</sub> ice |   |
| quartz              | 21.2                 | 20.8                 | 20.4                 | 24.1                 | 22.2                 | 24.5                 | 22.7                 | 30.1                 | 17.5    | 20.0    | 17.5    | 18.4    | 26.4                 | 21.2                 | 24.8                 | 21.4                 | 21.9    | 17.8    | 21.7     | 27.9                 |   |
| andesine            | 22.7                 | 23.3                 | 20.9                 | 33.4                 | 36.9                 | 40.6                 | 41.4                 | 46.4                 | 17.5    | 36.3    | 20.6    | 19.8    | 42.7                 | 23.2                 | 22.1                 | 24.4                 | 24.7    | 20.3    | 24.6     | 40.2                 |   |
| albite              | 18.2                 | 19.5                 | 21.6                 | 10.2                 | 6.2                  | 5.8                  | 6.7                  | 4.7                  | 17.7    | 6.3     | 15.9    | 15.2    | 10.6                 | 17.8                 | 21.9                 | 14.6                 | 15.9    | 21.5    | 21.4     | 6.2                  |   |
| anorthite           |                      |                      |                      | 7.9                  | 8.8                  | 6.0                  | 6.3                  |                      | 13.0    | 7.2     | 9.3     | 9.0     |                      | 8.4                  | 6.6                  | 13.4                 | 9.4     | 5.1     | 7.5      | 5.3                  |   |
| orthoclase          | 4.0                  | 2.2                  | 1.7                  | 6.0                  | 4.4                  | 3.7                  | 5.8                  | 4.7                  | 2.0     | 4.0     | 3.3     | 3.5     | 4.8                  | 4.4                  | 1.8                  | 2.0                  | 3.4     |         |          | 4.7                  |   |
| microcline          | 5.1                  | 6.2                  | 6.4                  | 4.5                  | 5.1                  | 8.0                  | 4.3                  | 7.6                  | 2.9     | 5.6     | 4.3     | 3.8     | 5.4                  | 4.3                  | 4.9                  | 5.4                  | 3.9     | 3.3     | 6.9      | 5.4                  |   |
| actinolite          | 10.5                 | 12.0                 | 11.7                 | 8.7                  | 10.1                 | 7.7                  | 8.0                  | 3.9                  | 13.0    | 14.2    | 14.5    | 13.4    | 4.1                  | 8.1                  | 6.2                  | 7.2                  | 6.4     | 13.0    | 5.1      | 6.1                  |   |
| enstatite           | 4.6                  | 5.2                  | 6.3                  | 1.9                  | 1.9                  | 1.2                  | 0.6                  | 0.8                  | 5.1     |         | 4.0     | 4.9     | 1.1                  | 4.9                  | 4.8                  | 3.2                  | 4.8     | 6.7     | 4.7      | 1.2                  |   |
| augite              | 2.0                  | 3.8                  | 3.9                  |                      |                      |                      | 0.9                  |                      | 3.8     |         | 2.9     | 3.4     | 1.1                  | 1.3                  | 3.3                  | 3.4                  | 4.2     | 3.2     | 1.7      |                      |   |
| diopside            |                      |                      |                      |                      | 0.9                  |                      | 2.2                  |                      |         |         |         |         |                      | 1.9                  |                      |                      |         |         |          |                      |   |
| muscovite           | 5.6                  | 4.6                  | 3.8                  | 2.0                  | 2.1                  | 1.6                  | 0.7                  | 1.5                  | 5.4     | 4.5     | 4.5     | 5.3     | 2.0                  | 2.5                  | 2.5                  | 3.2                  | 3.4     | 5.2     | 4.7      | 2.0                  |   |
| kaolinite           | 3.2                  | 2.5                  | 2.3                  | 1.1                  | 1.3                  | 0.5                  |                      | 0.4                  | 1.5     | 1.7     | 3.2     | 2.9     | 1.4                  | 1.3                  | 1.0                  | 1.2                  | 1.3     | 2.7     | 0.7      | 1.1                  |   |
| clinocllore         | 1.2                  |                      |                      |                      |                      |                      |                      |                      |         |         |         |         |                      |                      |                      |                      |         |         |          |                      |   |
| biotite             |                      |                      |                      |                      |                      |                      |                      |                      |         |         |         |         |                      |                      |                      |                      |         |         |          |                      |   |
| illite              | 1.7                  |                      | 0.8                  |                      |                      |                      |                      |                      |         |         |         |         |                      |                      |                      |                      |         |         | 0.5      |                      |   |
| hydroxylapatite     |                      | 0.1                  | 0.2                  | 0.3                  | 0.1                  | 0.4                  | 0.4                  |                      | 0.5     | 0.3     | 0.1     | 0.3     | 0.4                  | 0.7                  | 0.1                  | 0.6                  | 0.5     | 0.6     | 1.1      | 0.1                  |   |
| smectite            | no                   | yes                  | yes                  | no                   | no                   | no                   | yes                  | yes                  | yes     | yes     | yes     | yes     | no                   | no                   | yes                  | no                   | no      | no      | no       | no                   |   |
| Total:              | 100.0                | 100.0                | 100.0                | 100.0                | 100.0                | 100.0                | 100.0                | 100.0                | 100.0   | 100.0   | 100.0   | 100.0   | 100.0                | 100.0                | 100.0                | 100.0                | 100.0   | 100.0   | 100.0    | 100.0                |   |
| R <sub>wp</sub> (%) | 12.4                 | 12.3                 | 13.4                 | 17.0                 | 18.6                 | 22.2                 | 20.6                 | 23.4                 | 12.2    | 12.9    | 12.1    | 12.0    | 19.5                 | 20.3                 | 22.6                 | 28.6                 | 24.3    | 13.0    | 20.8     | 22.7                 |   |

**Supplementary Table 7.** Mineral class abundances in high algal biomass (H<sub>bio</sub>) ice sampled across the ablation zone in 2016. Values listed in weight percent of total mineral dust % ( $\pm$  standard error where applicable). Two-sided t-test comparing of mineral class abundances between site 3 and 4a.

| Year | Habitat              | Site | n | Framework silicates | Double chain silicates | Single chain silicates | Phyllosilicates | Apatite | Total: |
|------|----------------------|------|---|---------------------|------------------------|------------------------|-----------------|---------|--------|
| 2016 | H <sub>bio</sub> ice | 2    | 1 | 71.1                | 10.5                   | 6.6                    | 11.7            | 0.01    | 100.0  |

|      |                      |    |   |            |            |           |           |           |       |
|------|----------------------|----|---|------------|------------|-----------|-----------|-----------|-------|
|      |                      | 3  | 2 | 71.5 ± 0.5 | 11.8 ± 0.1 | 9.6 ± 0.6 | 7.0 ± 0.1 | 0.1 ± 0.1 | 100.0 |
|      |                      | 4a | 5 | 87.8 ± 1.6 | 7.7 ± 1.0  | 2.1 ± 0.5 | 2.2 ± 0.5 | 0.2 ± 0.1 | 100.0 |
|      |                      | 5  | 1 | 89.5       | 6.1        | 1.2       | 3.1       | 0.1       | 100.0 |
|      | DCC                  | 4a | 4 | 72.7 ± 2.2 | 13.8 ± 0.3 | 6.0 ± 2.1 | 7.2 ± 0.4 | 0.3 ± 0.1 | 100.0 |
| 2017 | H <sub>bio</sub> ice |    | 4 | 83.1 ± 2.3 | 6.4 ± 0.9  | 6.3 ± 1.4 | 3.8 ± 0.2 | 0.4 ± 0.1 | 100.0 |
|      | DCC                  | 4b | 1 | 79.3       | 6.4        | 9.0       | 4.7       | 0.5       | 100.0 |
|      | CC Hole              |    | 1 | 68.1       | 13.0       | 10.0      | 8.4       | 0.6       | 100.0 |

Comparison of mineral class abundances quantified for sites 3 and 4a (Welch two sample t-test, unequal variance)

|         | Framework silicates | Double chain silicates | Single chain silicates | Phyllosilicates |
|---------|---------------------|------------------------|------------------------|-----------------|
| t-value | 9.6                 | 4.0                    | 9.5                    | 9.8             |
| df      | 4.5                 | 4.1                    | 2.9                    | 4.2             |
| p-value | 0.0003              | 0.01                   | 0.003                  | 0.0005          |

**Supplementary Table 8.** Major cation and anion concentrations in the fluid phase and pH, conductivity and total dissolved solids (TDS) of supraglacial stream water and melted ice and snow samples.

| Site       | Sample ID  | Habitat                   | Cations ( $\mu\text{g}\cdot\text{L}^{-1}$ ) |                  |                  |                |                  |                  |                  | Anions ( $\mu\text{g}\cdot\text{L}^{-1}$ ) |                |                 |                              |                              |                               | pH   | Conductivity ( $\mu\text{S}\cdot\text{cm}^{-1}$ ) | TDS (ppm) |
|------------|------------|---------------------------|---------------------------------------------|------------------|------------------|----------------|------------------|------------------|------------------|--------------------------------------------|----------------|-----------------|------------------------------|------------------------------|-------------------------------|------|---------------------------------------------------|-----------|
|            |            |                           | Na <sup>+</sup>                             | Mg <sup>2+</sup> | Al <sup>3+</sup> | K <sup>+</sup> | Ca <sup>2+</sup> | Mn <sup>2+</sup> | Fe <sup>2+</sup> | P <sup>3-</sup>                            | F <sup>-</sup> | Cl <sup>-</sup> | NO <sub>2</sub> <sup>-</sup> | NO <sub>3</sub> <sup>-</sup> | SO <sub>4</sub> <sup>2-</sup> |      |                                                   |           |
| 1          | GrIS-16_1  | Clean snow                | 19.6                                        | 0.84             | <LOD             | <LOQ           | <LOD             | <LOQ             | <LOQ             | 0.89                                       | <LOD           | <LOD            | <LOD                         | <LOD                         | <LOD                          | 7.64 | 1.86                                              | 0.51      |
| 2          | GRIS-16_2  | H <sub>bio</sub> ice      | 30.18                                       | 2.41             | <LOQ             | <LOQ           | <LOD             | <LOD             | 24.88            | 0.75                                       | <LOD           | <LOD            | <LOD                         | <LOD                         | <LOD                          | 4.96 | 8.66                                              | 5.03      |
| 3          | GrIS-16_3  | H <sub>bio</sub> ice      | 50.09                                       | 2.93             | <LOQ             | <LOQ           | <LOD             | <LOQ             | 15.27            | 0.43                                       | <LOD           | <LOD            | <LOD                         | <LOD                         | <LOD                          | 5.32 | 4.41                                              | 2.66      |
|            | GrIS-16_4  | H <sub>bio</sub> snow     | 44.61                                       | 16.95            | 5.25             | <LOQ           | <LOD             | 0.35             | 147.23           | 0.70                                       | <LOD           | 972.1           | <LOD                         | <LOD                         | <LOD                          | 4.84 | 2.36                                              | 1.69      |
|            | GrIS-16_10 | H <sub>bio</sub> ice      | 53.51                                       | 4.44             | 5.03             | 18.55          | <LOD             | <LOD             | 17.06            | 0.86                                       | <LOD           | <LOD            | <LOD                         | <LOD                         | <LOD                          | 5.74 | 5.67                                              | 3.29      |
|            | GrIS-16_11 | H <sub>bio</sub> snow     | 35.87                                       | 1.83             | <LOQ             | 30.65          | <LOD             | <LOD             | 19.18            | 1.08                                       | <LOD           | <LOD            | <LOD                         | <LOD                         | <LOD                          | 5.69 | 6.91                                              | 3.85      |
|            | GrIS-16_5  | H <sub>bio</sub> ice      | 59.77                                       | 9.48             | 5.74             | 42.89          | <LOD             | 0.454            | 118.68           | 0.83                                       | <LOD           | <LOD            | <LOD                         | <LOD                         | <LOD                          | 6.39 | 1.62                                              | 1.27      |
| 4a         | GrIS-16_6  | H <sub>bio</sub> ice      | 49.58                                       | 7.61             | 9.12             | 22.17          | <LOD             | 0.104            | 34.72            | 0.64                                       | <LOD           | <LOD            | <LOD                         | <LOD                         | <LOD                          | 6.41 | 1.66                                              | 1.30      |
|            | GrIS-16_14 | H <sub>bio</sub> ice      | 43.12                                       | 12.47            | 5.49             | 25.31          | <LOD             | 0.069            | 37.06            | 0.96                                       | <LOD           | 282.4           | 25.3                         | <LOD                         | 2689                          | 6.36 | 2.08                                              | 1.53      |
|            | GrIS-16_17 | H <sub>bio</sub> ice      | 31.52                                       | 7.82             | <LOQ             | 19.38          | <LOD             | 0.374            | 118.86           | 1.32                                       | <LOD           | 110.1           | <LOD                         | <LOD                         | <LOD                          | 5.47 | 2.64                                              | 1.77      |
|            | GrIS-16_28 | H <sub>bio</sub> ice      | 36.41                                       | 3.00             | <LOQ             | 53.55          | <LOD             | <LOD             | 34.09            | 0.76                                       | <LOD           | <LOD            | <LOD                         | <LOD                         | <LOD                          | 5.76 | 2.04                                              | 1.50      |
|            | GrIS-16_13 | DCC ice                   | 33.65                                       | 5.06             | <LOQ             | 24.37          | <LOD             | 0.09             | 27.37            | 0.74                                       | <LOD           | <LOD            | <LOD                         | <LOD                         | <LOD                          | 6.09 | 1.71                                              | 1.36      |
|            | GrIS-16_18 | DCC ice                   | 18.84                                       | 4.51             | <LOQ             | 20.64          | <LOD             | <LOQ             | 33.75            | 1.07                                       | <LOD           | 1236            | <LOD                         | <LOD                         | <LOD                          | 5.50 | 2.82                                              | 1.89      |
|            | GrIS-16_29 | DCC ice                   | 49.30                                       | 5.69             | 18.06            | 63.50          | <LOD             | 0.119            | 45.95            | 1.91                                       | <LOD           | <LOD            | <LOD                         | <LOD                         | <LOD                          | 5.08 | 3.73                                              | 2.30      |
|            | GrIS-16_12 | Clean ice                 | 37.21                                       | 0.97             | <LOD             | 22.39          | <LOD             | <LOD             | 2.25             | 0.29                                       | <LOD           | <LOD            | <LOD                         | <LOD                         | 300                           | 7.28 | 1.25                                              | 1.08      |
|            | GrIS-16_16 | Clean ice                 | 18.51                                       | 0.84             | <LOD             | <LOQ           | <LOD             | 0.19             | 41.41            | 0.48                                       | <LOD           | <LOD            | <LOD                         | <LOD                         | <LOD                          | 5.99 | 1.52                                              | 1.25      |
|            | GrIS-16_27 | Clean ice                 | 20.40                                       | 3.04             | <LOD             | 16.25          | <LOD             | <LOD             | 3.73             | 0.33                                       | <LOD           | <LOD            | <LOD                         | 108.2                        | <LOD                          | 5.68 | 1.66                                              | 1.28      |
|            | GrIS-16_15 | Supraglacial stream water | 20.56                                       | 2.93             | <LOD             | <LOQ           | <LOD             | <LOD             | <LOQ             | 0.32                                       | <LOD           | 114.8           | <LOD                         | <LOD                         | <LOD                          | 6.38 | 1.78                                              | 1.45      |
|            | GrIS-16_23 | Supraglacial stream water | 23.73                                       | 3.20             | <LOD             | 7.66           | <LOD             | <LOD             | <LOD             | 0.22                                       | <LOD           | <LOD            | <LOD                         | <LOD                         | <LOD                          | 5.71 | 1.55                                              | 1.25      |
|            | 4b         | GrIS-17-24                | H <sub>bio</sub> ice                        | 20.61            | 7.02             | <LOD           | 11.32            | 11.42            | 0.16             | 20.66                                      | 1.08           | <LOD            | <LOD                         | ND                           | ND                            | <LOD | 6.79                                              | 2.48      |
| GrIS-17-26 |            | H <sub>bio</sub> ice      | 26.67                                       | 7.58             | <LOD             | 13.56          | 11.03            | 0.18             | 16.60            | 1.38                                       | <LOD           | 2953            | ND                           | ND                           | <LOD                          | 7.15 | 2.32                                              | 1.68      |

|      |               |                                         |                     |       |       |        |       |       |       |      |      |       |      |      |      |      |      |      |
|------|---------------|-----------------------------------------|---------------------|-------|-------|--------|-------|-------|-------|------|------|-------|------|------|------|------|------|------|
|      | GrIS-17-28    | H <sub>bio</sub> ice                    | 29.21               | 9.92  | <LOD  | 22.38  | 16.25 | 0.23  | 38.57 | 2.21 | <LOD | 289.6 | ND   | ND   | <LOD | 5.40 | 3.16 | 2.06 |
|      | GrIS-17-25    | DCC ice                                 | 23.09               | 11.61 | <LOQ  | 23.17  | 23.21 | 0.29  | 38.51 | 1.35 | <LOD | 10468 | ND   | ND   | <LOD | 5.20 | 2.15 | 1.64 |
|      | GrIS-17-33    | Clean ice                               | 46.72               | <LOQ  | <LOD  | 16.48  | 10.17 | 0.12  | 1.90  | 0.76 | <LOD | 4505  | ND   | ND   | <LOD | 5.26 | 3.46 | 2.19 |
| 5    | GrIS-16_24(1) | H <sub>bio</sub> ice                    | 60.27               | 20.72 | 11.52 | 117.70 | <LOD  | 0.37  | 84.94 | 2.02 | <LOD | <LOD  | <LOD | <LOD | <LOD | 5.70 | 4.91 | 2.90 |
|      | GrIS-16_24(2) | H <sub>bio</sub> ice                    | 52.64               | 19.50 | 10.95 | 99.21  | <LOD  | 0.33  | 83.85 | 2.43 | <LOD | ND    | ND   | ND   | ND   | ND   | ND   | ND   |
|      | GrIS-16_25(1) | H <sub>bio</sub> ice                    | 79.39               | 4.91  | 12.14 | 45.74  | <LOD  | 0.10  | 45.83 | 1.25 | <LOD | <LOD  | <LOD | <LOD | <LOD | 5.70 | 3.24 | 2.09 |
|      | GrIS-16_25(2) | H <sub>bio</sub> ice                    | 53.33               | 4.59  | 12.14 | 40.71  | <LOD  | 0.05  | 47.15 | 1.21 | <LOD | ND    | ND   | ND   | ND   | ND   | ND   | ND   |
|      | GrIS-16_26(1) | H <sub>bio</sub> ice                    | 32.57               | 23.24 | 11.79 | 89.31  | <LOD  | 0.32  | 71.35 | 1.82 | <LOD | <LOD  | <LOD | <LOD | <LOD | 5.68 | 4.66 | 2.75 |
|      | GrIS-16_26(2) | H <sub>bio</sub> ice                    | 35.75               | 24.22 | 12.46 | 98.33  | <LOD  | 0.33  | 74.33 | 1.92 | <LOD | ND    | ND   | ND   | ND   | ND   | ND   | ND   |
|      |               |                                         | LOD/LOQ/Uncertainty | Na    | Mg    | Al     | K     | Ca    | Mn    | Fe   | P    | F     | Cl   | NO2  | NO3  | SO4  |      |      |
| 2016 |               | LOD / $\mu\text{g} \cdot \text{L}^{-1}$ | 4.26                | 0.171 | 1.46  | 4.67   | 3.81  | 0.015 | 0.242 | 0.37 | <20  | <100  | <20  | <100 | <100 |      |      |      |
|      |               | LOQ / $\mu\text{g} \cdot \text{L}^{-1}$ | 14.2                | 0.569 | 4.88  | 15.6   | 12.7  | 0.051 | 0.808 |      |      |       |      |      |      |      |      |      |
|      |               | % Uncertainty                           | 0.874               | 0.876 | 1.57  | 1.07   | 1.56  | 0.448 | 0.686 |      |      |       |      |      |      |      |      |      |
| 2017 |               | LOD / $\mu\text{g} \cdot \text{L}^{-1}$ | 0.41                | 0.31  | 1.53  | 0.14   | 0.78  | 0.02  | 0.06  | 0.37 | <20  | <100  | <20  | <100 | <100 |      |      |      |
|      |               | LOQ / $\mu\text{g} \cdot \text{L}^{-1}$ | 1.36                | 1.03  | 5.11  | 0.45   | 2.61  | 0.06  | 0.20  |      |      |       |      |      |      |      |      |      |
|      |               | % Uncertainty                           | 3.13                | 1.24  | 2.66  | 3.46   | 2.55  | 1.06  | 2.19  |      |      |       |      |      |      |      |      |      |

LOD: level of detection, LOQ: level of quantification, ND: no data

### Supplementary Table 9. Number of raw and processed sequences after each quality filtering step for 16S, ITS2 and 18S.

| Sample ID | 16S    |          |         |        |              |                      | ITS2   |          |         |        |              |                   | 18S    |          |         |        |              |                   |
|-----------|--------|----------|---------|--------|--------------|----------------------|--------|----------|---------|--------|--------------|-------------------|--------|----------|---------|--------|--------------|-------------------|
|           | Raw    | Filtered | Denosed | Merged | Non-chimeric | Assigned to bacteria | Raw    | Filtered | Denosed | Merged | Non-chimeric | Assigned to fungi | Raw    | Filtered | Denosed | Merged | Non-chimeric | Assigned to algae |
| GrIS16-2  | 289712 | 190852   | 190852  | 164375 | 130211       | 83185                | 147601 | 52500    | 52500   | 50821  | 50788        | 49959             | 310981 | 252386   | 252386  | 248557 | 224527       | 125058            |
| GrIS16-3  | 254898 | 170652   | 170652  | 129107 | 102516       | 80636                | 71630  | 20990    | 20990   | 18759  | 18759        | 17294             | 336077 | 272840   | 272840  | 268993 | 251714       | 166746            |
| GrIS16-4  | 267420 | 183257   | 183257  | 156460 | 141775       | 17013                | 158228 | 58681    | 58681   | 52515  | 52155        | 49068             | 301594 | 246533   | 246533  | 243593 | 225056       | 148673            |
| GrIS16-5  | 290907 | 192924   | 192924  | 170808 | 139361       | 91343                | 110908 | 41966    | 41966   | 38700  | 38211        | 37174             | 210774 | 175300   | 175300  | 173581 | 164441       | 106563            |
| GrIS16-6  | 294136 | 201759   | 201759  | 186041 | 155293       | 80146                | 130211 | 43919    | 43919   | 38423  | 38297        | 37519             | 279352 | 229231   | 229231  | 227071 | 214042       | 145812            |
| GrIS16-7  | 346321 | 223809   | 223809  | 198924 | 159024       | 118162               | 158973 | 63087    | 63087   | 59331  | 58238        | 55876             | 281200 | 231400   | 231400  | 229643 | 219069       | 154027            |
| GrIS16-8  | 278728 | 183511   | 183511  | 161012 | 131176       | 87124                | 161976 | 66741    | 66741   | 59109  | 58480        | 55794             | 233059 | 191604   | 191604  | 189926 | 178340       | 118248            |
| GrIS16-9  | 132033 | 84611    | 84611   | 82900  | 77400        | 1832                 | 171365 | 57896    | 57896   | 51397  | 50552        | 50263             | 286241 | 230671   | 230671  | 228713 | 213856       | 170083            |
| GrIS16-10 | 180400 | 124827   | 124827  | 98821  | 78626        | 67778                | 100239 | 31534    | 31534   | 31139  | 31139        | 30541             | 268286 | 210568   | 210568  | 207770 | 192551       | 125404            |

|           |        |        |        |        |        |        |        |       |       |       |       |       |        |        |        |        |        |        |  |  |  |  |
|-----------|--------|--------|--------|--------|--------|--------|--------|-------|-------|-------|-------|-------|--------|--------|--------|--------|--------|--------|--|--|--|--|
| GrIS16-11 | 199531 | 135949 | 135949 | 132767 | 122045 | 5529   | 171851 | 67602 | 67602 | 60832 | 60210 | 51480 | 311224 | 246148 | 246148 | 241952 | 216760 | 135203 |  |  |  |  |
| GrIS16-12 | 242133 | 159605 | 159605 | 141481 | 124580 | 42606  | 98455  | 28779 | 28779 | 28213 | 28174 | 28014 | 366600 | 292239 | 292239 | 289930 | 267170 | 175073 |  |  |  |  |
| GrIS16-13 | 324772 | 209708 | 209708 | 190270 | 151530 | 114567 | 108322 | 32009 | 32009 | 29256 | 28183 | 27081 | 461687 | 370480 | 370480 | 366340 | 341858 | 218267 |  |  |  |  |
| GrIS16-14 | 305051 | 194518 | 194518 | 158474 | 123925 | 119729 | 88071  | 26884 | 26884 | 25216 | 24597 | 23826 | 344456 | 263619 | 263619 | 260994 | 251561 | 89060  |  |  |  |  |
| GrIS16-16 | 223194 | 149814 | 149814 | 136240 | 115550 | 47247  | 140556 | 46619 | 46619 | 40938 | 39678 | 38937 | 356179 | 286624 | 286624 | 284526 | 271745 | 234608 |  |  |  |  |
| GrIS16-17 | 324911 | 216965 | 216965 | 192451 | 156402 | 96795  | 143461 | 50748 | 50748 | 44894 | 44113 | 41842 | 263309 | 210795 | 210795 | 208592 | 194510 | 127991 |  |  |  |  |
| GrIS16-18 | 295450 | 189188 | 189188 | 167762 | 134466 | 103528 | 100178 | 32451 | 32451 | 28697 | 27834 | 27653 | 210713 | 169836 | 169836 | 166821 | 159286 | 94778  |  |  |  |  |
| GrIS16-27 | 184582 | 124637 | 124637 | 118512 | 109465 | 14782  | 119924 | 44840 | 44840 | 43916 | 43101 | 42127 | 263969 | 214407 | 214407 | 213491 | 205146 | 180132 |  |  |  |  |
| GrIS17-24 | 44426  | 33719  | 33719  | 29346  | 28684  | 806    |        |       |       |       |       |       | 92634  | 80112  | 80112  | 79444  | 76688  | 62883  |  |  |  |  |
| GrIS17-25 | 17171  | 9855   | 9855   | 9689   | 9129   | 1232   |        |       |       |       |       |       | 68088  | 58606  | 58606  | 58309  | 56268  | 47567  |  |  |  |  |
| GrIS17-26 | 110135 | 82856  | 82856  | 82266  | 80477  | 1409   |        |       |       |       |       |       | 70931  | 61781  | 61781  | 61376  | 59323  | 50515  |  |  |  |  |
| GrIS17-27 | 67170  | 48761  | 48761  | 43307  | 36383  | 36262  |        |       |       |       |       |       | 87598  | 73744  | 73744  | 73112  | 71848  | 7161   |  |  |  |  |
| GrIS17-28 | 131297 | 99794  | 99794  | 97472  | 92206  | 15636  |        |       |       |       |       |       | 76839  | 66105  | 66105  | 65430  | 63044  | 51840  |  |  |  |  |
| GrIS17-29 | 114759 | 87529  | 87529  | 86377  | 83186  | 5801   |        |       |       |       |       |       | 132476 | 113532 | 113532 | 112795 | 108243 | 89390  |  |  |  |  |
| GrIS17-33 | 58038  | 43210  | 43210  | 42345  | 39479  | 9248   |        |       |       |       |       |       | 106162 | 93596  | 93596  | 93421  | 93410  | 90165  |  |  |  |  |
| GrIS17-34 | 85071  | 66375  | 66375  | 65878  | 63054  | 7142   |        |       |       |       |       |       | 142082 | 124158 | 124158 | 123049 | 118368 | 98835  |  |  |  |  |
| GrIS17-35 | 64118  | 48428  | 48428  | 47513  | 45430  | 7652   |        |       |       |       |       |       | 164414 | 144185 | 144185 | 142948 | 136829 | 108919 |  |  |  |  |

**Supplementary Table 10.** Table shows the full bacterial community composition with the taxonomic assignments of each ASV on the lowest possible level. Values represent the relative abundances of the 16S ASVs in percentage of the total number of sequences and collapsed on the species level. Values are rounded to one decimal place, thus “<” represents relative abundance values < 0.05 and > 0.

| Phylum         | Class          | Order                                  | Year              | 2016      |      |      |      |       |      |      |      |      |       |       |       | 2017  |       |       |       |       |       |       |       |       |       |
|----------------|----------------|----------------------------------------|-------------------|-----------|------|------|------|-------|------|------|------|------|-------|-------|-------|-------|-------|-------|-------|-------|-------|-------|-------|-------|-------|
|                |                |                                        |                   | Site      | 2    | 3    | 3    | 3     | 4a   | 4a   | 4a   | 4a   | 4a    | 4a    | 4a    | 4a    | 4a    | 4a    | 4a    | 4b    | 4b    | 4b    | 4b    | 4b    | 4b    |
|                |                |                                        |                   | Sample ID | 16-2 | 16-3 | 16-4 | 16-10 | 16-5 | 16-6 | 16-7 | 16-8 | 16-12 | 16-13 | 16-14 | 16-16 | 16-17 | 16-18 | 16-27 | 17-27 | 17-28 | 17-29 | 17-33 | 17-34 | 17-35 |
| Acidobacteria  | Acidobacteria  | Acidobacteriales                       | Acidobacteriaceae | 22.5      | 15.8 | 19.9 | 18.5 | 3.4   | 3.1  | 2.7  | 3.3  | 28.0 | 4.8   | 5.3   | 3.8   | 4.4   | 2.1   | 4.0   | 0.4   | 4.9   | 3.1   | 1.5   | 5.3   | 3.9   |       |
|                |                | Acidobacteriaceae                      | 0.5               | 0.4       | 0    | 0.4  | 0.1  | 0.1   | <    | 0.1  | <    | <    | 0.1   | 0.1   | 0.1   | 0.1   | <     | 0     | 0.1   | 0     | 0     | 0     | 0     | 0     | 0     |
|                | Solibacteres   | Solibacteriales                        | 0                 | 0.1       | 0    | 0.1  | 0    | 0     | <    | 0    | 0    | 0    | 0     | 0     | 0     | 0     | 0     | 0     | 0     | 0     | 0     | 0     | 0     | 0     | 0     |
|                |                | Solibacteraceae                        | 0                 | 0         | 0    | 0    | 0    | <     | <    | 0    | <    | 0    | 0     | <     | 0     | 0     | 0     | 0     | 0.1   | 0     | 0     | 0     | 0     | 0     | 0     |
|                |                | Solibacteraceae; Candidatus Solibacter | 0                 | 0.7       | 0    | 0.8  | <    | <     | 0    | <    | 0    | 0    | <     | 0     | 0     | 0     | 0     | <     | 0     | 0     | 0     | 0     | 0     | 0     | 0     |
| Actinobacteria | Actinobacteria | Acidimicrobiales                       |                   | 0         | 1.1  | 0    | 0.6  | 0.1   | 0.2  | 0.4  | 0.2  | <    | 0.2   | 0.3   | 0.6   | 0.1   | 0.4   | 0.1   | 0.7   | 0.1   | 0     | 0.8   | 0     | 0.3   |       |
|                |                | EB1017                                 | 0                 | 0         | 0    | 0    | 0    | 0     | 0    | 0    | 0    | 0    | 0     | 0     | 0     | 0     | 0     | 0     | 0     | 0     | 0     | 0.2   | 0     | 0     |       |
|                |                |                                        | 0                 | 0.1       | 0    | 0.1  | 0    | <     | <    | 0.1  | 0    | 0    | 0     | <     | <     | <     | 0     | 0.1   | 0     | 0     | 0     | 0     | 0     | 0     | 0     |

|                  |                         |                                                   |                                          |      |      |     |      |      |      |      |      |      |      |      |      |      |      |      |      |      |      |     |      |      |      |
|------------------|-------------------------|---------------------------------------------------|------------------------------------------|------|------|-----|------|------|------|------|------|------|------|------|------|------|------|------|------|------|------|-----|------|------|------|
|                  |                         | Actinomycetales                                   |                                          | 0    | 0    | 0   | 0    | 0    | 0    | 0    | 0    | 0    | 0    | 0    | 0    | 0    | 0    | 0    | 0    | 0    | 0    | 0   |      |      |      |
|                  |                         | ACK-M1                                            |                                          | 1.6  | 2.8  | 0   | 3.0  | 0.3  | 0.5  | 0.1  | 0.9  | 0.2  | 0.3  | 1.2  | 0.7  | 0.4  | 0.3  | 0.3  | 0.8  | 0.3  | 0    | 0.4 | 0.1  | 0.4  |      |
|                  |                         | Corynebacteriaceae; Corynebacterium               |                                          | 0    | 0    | 0   | 0    | 0    | 0    | 0    | 0    | 0    | 0    | 0    | 0    | 0    | 0    | 0    | 0    | 0    | 0    | 0.9 | 0    | 0    |      |
|                  |                         | Intrasporangiaceae                                |                                          | 0    | 0    | 0   | 0    | <    | <    | <    | <    | 0    | 0    | <    | 0.1  | <    | 0    | 0    | 0    | 0    | 0    | 0   | 0    | 0    | 0    |
|                  |                         | Intrasporangiaceae                                |                                          | 0    | 0    | 0   | 0    | 0    | 0    | 0    | 0    | 0    | 0    | 0    | 0    | 0    | 0    | 0    | 0    | 0    | 0    | 0   | 0    | 0    | 0    |
|                  |                         | Microbacteriaceae                                 |                                          | 3.9  | 0.4  | 1.0 | 0.6  | <    | 0.1  | <    | 0.1  | 0    | 0.1  | 0.1  | 0.1  | <    | <    | 0    | 0.3  | 0.5  | 0    | 0.2 | 0    | 0.2  |      |
|                  |                         | Microbacteriaceae; Salinibacterium                |                                          | 14.8 | 8.1  | 0.5 | 8.1  | 0.4  | 0.7  | 0.4  | 0.5  | 3.3  | 1.0  | 0.5  | 1.1  | 0.8  | 0.7  | 1.7  | 0.4  | 1.8  | 0.7  | 3.1 | 1.5  | 2.7  |      |
|                  |                         | Microbacteriaceae; Salinibacterium                |                                          | 0.5  | 0.1  | 0   | 0.3  | 0    | 0    | 0    | 0    | 0    | 0    | 0    | 0    | 0    | 0    | 0    | 0.1  | 0    | 0    | 0   | 0    | 0    |      |
|                  |                         | Nakamurellaceae                                   |                                          | 0    | 0.2  | 0   | 0.2  | 0    | 0.1  | <    | <    | 0    | <    | <    | 0    | 0    | 0    | 0    | 0    | 0    | 0    | 0   | 0    | 0    |      |
|                  |                         | Propionibacteriaceae; Propionibacterium; P. acnes |                                          | 0    | 0    | 0   | 0    | 0    | 0    | 0    | 0    | 0    | 0    | 0    | 0    | 0    | 0    | 0    | 0    | 0    | 0    | 0.4 | 0    | 0    |      |
|                  |                         | Sporichthyaceae                                   |                                          | 0    | 0.8  | 0.1 | 1.3  | 0.1  | 0.1  | 0.1  | 0.1  | 0.1  | 0.1  | <    | 0.3  | 0.2  | 0.2  | 0.3  | 0.2  | 0.2  | 0.2  | 0.8 | 0    | 0.5  |      |
| Armatimonadetes  | Armatimonadales         | Armatimonadaceae                                  |                                          | 0    | 0.5  | <   | 0.5  | 0.7  | 0.6  | 0.4  | 0.6  | 0.1  | 0.5  | 0.6  | 0.2  | 0.2  | <    | 0.1  | 0.1  | 0.2  | 0.5  | 0   | 0    | 0.2  |      |
|                  |                         | FW68                                              |                                          | 11.0 | 21.8 | 8.6 | 22.7 | 10.8 | 9.5  | 7.5  | 10.6 | 13.3 | 12.1 | 10.1 | 8.4  | 13.3 | 9.9  | 6.1  | 1.0  | 29.5 | 40.8 | 2.8 | 46.5 | 14.7 |      |
|                  | Chthonomonadales        | Chthonomonadaceae                                 |                                          | 0.2  | 0.3  | 0   | 1.1  | 0.4  | 0.3  | 0.6  | 0.8  | 0.4  | 0.4  | 0.5  | 0.5  | 0.3  | 0.3  | 0.2  | 0.4  | <    | 0.3  | 0.1 | 0    | 0.2  |      |
| Bacteroidetes    | Cytophagia Bacteroidia  | Cytophagales                                      | Cytophagaceae; Cytophaga                 |      | 0    | <   | 0    | 0    | 0.1  | <    | 0.1  | <    | 0.1  | 0    | <    | 0.1  | <    | 0    | 0.3  | 0.6  | 0    | 0   | 0    | 0    |      |
|                  |                         |                                                   | Cytophagaceae; Flectobacillus            |      | 0.1  | <   | 0.9  | 0    | 0.1  | <    | 0    | <    | 0.2  | 0    | 0    | 0.2  | <    | 0    | 0.3  | 0    | 0    | 0   | 0    | 0    | 0    |
|                  |                         |                                                   | Cytophagaceae; Hymenobacter              |      | 0    | 0   | 0    | 0    | 0    | 0    | 0    | 0    | 0    | 0    | 0    | 0    | 0    | 0    | 0    | 0.3  | 0    | 0   | 0    | 0    | 0    |
|                  |                         |                                                   | Cytophagaceae; Hymenobacter              |      | 0    | 0   | 0    | 0    | 0    | 0    | 0    | 0    | 0    | <    | 0    | 0    | <    | <    | 0    | 0    | 0    | 0   | 0    | 0    | 0    |
|                  |                         |                                                   | Chitinophagaceae; Flavisolibacter        |      | <    | 0   | 2.1  | <    | <    | 0    | <    | 0    | 0.2  | <    | 0    | 0.2  | 0.1  | <    | 0.4  | 0    | 0    | 0   | 0    | 0    | 0    |
|                  |                         |                                                   |                                          | 0    | 0    | 0   | 0    | 0.6  | 0.7  | 0.7  | 0.9  | <    | 0.4  | 0.4  | 1.0  | 0.6  | 0.8  | 0.6  | 0.4  | 0.2  | 0.1  | 0.6 | 0.2  | 0.3  |      |
| Chloroflexi      | Kiedono-bacteria lineae | SBR1031                                           | oc28                                     |      | 0    | 0   | 0    | 0    | 0.8  | 0.5  | 1.1  | 0.8  | 0    | 0.4  | 1.0  | 0.5  | 0.5  | 0.6  | 0.1  | 0.9  | <    | 0.1 | 0.2  | 0    | 0.1  |
|                  |                         | Thermogemmatisporales                             | Thermogemmatisporaceae                   |      | 0    | 0   | 0    | 0    | 0.5  | 0.5  | 0.8  | 0.9  | 0.1  | 0.5  | 0.7  | 0.7  | 0.5  | 0.9  | 0.3  | 1.9  | 0.1  | 0.2 | 0.4  | 0    | 0    |
|                  |                         |                                                   |                                          |      | <    | <   | 0    | 0    | 25.2 | 28.6 | 28.2 | 23.4 | 8.1  | 23.5 | 22.7 | 28.6 | 23.6 | 28.9 | 23.0 | 32.6 | 17.7 | 6.4 | 16.9 | 5.9  | 15.7 |
|                  | Thermomicrobia          | Ellin6537                                         |                                          | 0    | 0    | 0   | 0    | 0.1  | 0.1  | 0.1  | 0.1  | 0    | 0    | <    | 0.2  | 0    | 0.1  | <    | 0.1  | 0    | 0    | 0   | 0    | 0    |      |
| Cyanobacteria    | Synecho-Coccolphyceidae | Pseudanabaenales                                  | Pseudanabaenaceae; Leptolyngbya          |      | 0    | 0.2 | 0.6  | 0.1  | 15.5 | 13.8 | 16.4 | 12.0 | 8.9  | 19.3 | 12.7 | 15.4 | 14.1 | 12.0 | 23.4 | 16.7 | 4.4  | 5.5 | 26.6 | 9.2  | 12.8 |
|                  |                         | Synechococcales                                   | Chamaesiphonaceae                        |      | 0    | <   | 0    | 0.6  | 7.7  | 6.9  | 9.4  | 9.0  | 0.5  | 6.3  | 9.1  | 7.1  | 4.4  | 10   | 2.3  | 15.6 | 1.4  | 1.3 | 2.7  | 0.3  | 1.7  |
|                  |                         |                                                   |                                          |      | 0    | 0.3 | 0    | 2.3  | 2.1  | 2.0  | 3.2  | 2.5  | 0    | 1.2  | 1.2  | 0.4  | 1.1  | 1.8  | 0.1  | 2.5  | 0.7  | 0.9 | 2.3  | 0.1  | 0.9  |
| Firmicutes       | Clostridia              | Clostridiales                                     | Clostridiaceae; Clostridium; C. bowmanii |      | 0.1  | 0.3 | 0    | 0.1  | 0    | 0    | 0    | 0    | 0    | 0    | 0    | 0    | 0    | 0    | 0    | 0    | 0    | 0   | 0    | 0    |      |
| Gemmatimonadetes | Gemmatimonadetes        | N1423WL                                           |                                          |      | 0    | 0   | 0    | 0    | 0    | 0    | 0    | 0    | 0    | 0    | 0    | 0    | 0    | 0    | 0    | 0    | 0    | 0   | 0.4  | 0    | 0    |
|                  |                         |                                                   |                                          |      | 0    | 0   | 0    | 0    | 0    | 0.1  | <    | 0.2  | 0    | 0    | 0.1  | 0    | 0    | <    | 0    | <    | 0    | 0   | 0    | 0    | 0    |

|                     |                     |                                     |                                                     |                                  |      |      |      |      |      |      |      |      |      |      |      |      |      |      |      |      |      |      |      |      |     |   |
|---------------------|---------------------|-------------------------------------|-----------------------------------------------------|----------------------------------|------|------|------|------|------|------|------|------|------|------|------|------|------|------|------|------|------|------|------|------|-----|---|
| ODI                 |                     |                                     | 0                                                   | 0.1                              | 0.1  | 0.1  | 0    | <    | <    | <    | 0    | <    | 0    | 0    | <    | 0    | 0    | 0    | 0    | 0.1  | 0.1  | 0    | 0    | 0    |     |   |
| Plancto-<br>mycetes | Plancto-<br>myceta  | Gemmatales                          | 0                                                   | 0                                | 0    | 0    | 0.1  | 0.1  | 0.3  | 0.3  | 0    | 0.1  | 0.1  | 0    | 0.1  | 0.1  | 0    | 0.5  | 0    | 0    | 0    | 0    | 0    | 0    |     |   |
|                     |                     | Gemmataceae; Gemmata                | 0                                                   | 0                                | 0    | 0    | 0.1  | 0    | 0    | 0.1  | 0    | 0    | 0    | <    | 0.1  | 0    | 0    | 0.1  | 0    | 0    | 0    | 0    | 0    | 0    | 0   |   |
|                     |                     | Isosphaeraceae                      | 0                                                   | 0.5                              | 0.1  | 0.8  | 0.3  | 0.2  | 0.1  | 0.2  | 0.1  | 0.1  | <    | 0.3  | 0.3  | 0.3  | 0.1  | <    | 0.1  | 0    | 0    | 0    | 0    | 0    | 0.3 |   |
| Proteobacteria      | Alphaproteobacteria | Caulobacterales                     | Caulobacteraceae                                    | 0                                | <    | 0    | 0.2  | <    | 0.1  | 0.1  | 0.1  | <    | 0    | 0.1  | 0.1  | 0.1  | 0.1  | 0    | 0    | 0    | 0    | 0    | 0    | 0    |     |   |
|                     |                     | Caulobacteraceae; Phenylbacterium   | 0                                                   | 0.6                              | 0    | 0.2  | 0    | 0    | 0    | 0    | 0    | 0    | 0    | 0    | 0    | 0    | 0    | 0    | 0    | 0    | 0    | 0    | 0    | 0    | 0   |   |
|                     |                     | Rhizobiales                         | 0                                                   | 0.2                              | 0    | 0.3  | 0    | 0    | 0    | 0    | 0    | 0    | 0    | 0    | 0    | 0    | 0    | 0    | 0    | 0    | 0    | 0    | 0    | 0    | 0   |   |
|                     |                     | Bradyrhizobiaceae                   | 0                                                   | <                                | 0    | 0.1  | 0.2  | 0.3  | 0.3  | 0.2  | <    | 0.2  | 0.2  | 0.6  | 0.2  | 0.3  | 0.2  | 0.5  | 0.2  | 0.2  | 0    | 0    | 0    | 0.2  | 0   |   |
|                     |                     | Bradyrhizobiaceae; Bosea; B. genosp | 0.1                                                 | 0.1                              | 0    | 0.3  | 0    | 0    | 0    | 0    | 0    | 0    | 0    | 0    | 0    | 0    | 0    | 0    | 0    | 0    | 0    | 0    | 0    | 0    | 0   |   |
|                     |                     | Methylocystaceae                    | 0                                                   | 0                                | 0    | 0    | 0.3  | 0.2  | 0.1  | 0.2  | 0    | 0    | 0.1  | 0.1  | 0.1  | 0    | 0.1  | 0.5  | 0    | 0.4  | 0    | 0    | 0    | 0    | 0   |   |
|                     |                     | Rhizobiaceae; Agrobacterium         | 0                                                   | 0                                | 0    | 0    | 0    | 0    | 0    | 0    | 0    | 0    | 0    | 0    | 0    | 0    | 0    | 0    | 0    | 0    | 0    | 0    | 0    | 0    | 0   |   |
|                     |                     | Rhodospirillales                    | Acetobacteraceae                                    | 25.8                             | 19.0 | 61.0 | 17.3 | 23.2 | 22.2 | 21.1 | 18.1 | 25.0 | 23.3 | 14.9 | 12.0 | 24.5 | 23.1 | 24.2 | 15.6 | 32.4 | 30.2 | 33.3 | 28.7 | 38.4 |     |   |
|                     |                     | Rickettsiales                       | 0                                                   | 0                                | 0    | 0    | 0    | 0    | 0    | 0    | 0    | 0    | 0    | 0    | 0    | 0    | 0    | 0    | <    | 0    | 0    | 0    | 0.1  | 0.1  |     |   |
|                     |                     | Sphingomonadales                    | 6.6                                                 | 6.8                              | 3.4  | 3.1  | 1.0  | 0.7  | 0.6  | 1.4  | 1.7  | 0.8  | 1.5  | 1.9  | 1.1  | 0.7  | 1.9  | 0.2  | 1.8  | 5.4  | 0    | 1.2  | 1.3  |      |     |   |
|                     |                     |                                     | 0.1                                                 | 1.2                              | 0.3  | 1.3  | 2.1  | 3.0  | 1.5  | 4.8  | 1.2  | 1.0  | 6.7  | 5.8  | 3.3  | 1.5  | 2.8  | 1.4  | 0.8  | 1.2  | 1.8  | 0.2  | 1.4  |      |     |   |
|                     |                     |                                     | Sphingomonadaceae; Novosphingobium                  | 2.3                              | 0.5  | 0    | 0.4  | 0    | 0    | 0    | 0    | 0    | 0    | 0    | 0    | 0    | 0    | 0    | 0.3  | 0    | 0    | 0    | 0    | 0    | 0   |   |
|                     |                     |                                     | Sphingomonadaceae; Novosphingobium                  | 0                                | 0    | 0    | 0    | 0    | 0    | 0    | 0    | 0    | 0    | 0    | 0    | 0    | 0    | 0    | 0    | 0    | 0    | 0    | 0    | 0    | 0   |   |
|                     |                     |                                     | Sphingomonadaceae; Sphingomonas;<br>S. echinoides   | 1.0                              | 0    | 1.1  | 0    | 0    | 0    | 0    | 0    | 0    | 0    | 0    | 0    | 0    | 0    | 0    | 0    | 0    | 0    | 0    | 0    | 0    | 0   |   |
|                     |                     |                                     | Sphingomonadaceae; Zymomonas                        | 0                                | 0.4  | 0.2  | 0.5  | 0.7  | 0.7  | 0.3  | 0.5  | 0.2  | 0.5  | 0.7  | 0.1  | 0.1  | 0    | 0.1  | 0.3  | 0.3  | 0.6  | 0    | 0    | 0.2  |     |   |
|                     |                     |                                     | Comamonadaceae; Rhodoferax                          | 0                                | 0    | 0    | 0    | 0    | 0    | 0    | 0    | 0    | 0    | 0    | 0    | 0    | 0    | 0    | 0    | 0    | 0    | 0    | 0    | 0    | 0   |   |
|                     |                     |                                     | Bdellovibrionales                                   | Bdellovibrionaceae; Bdellovibrio | 0.4  | 0.7  | 0    | 0.4  | 0.1  | 0.3  | 0.2  | 0.4  | 0    | 0.2  | 0.4  | <    | <    | <    | <    | 0.1  | 0    | 0    | 0    | 0    | 0   | 0 |
|                     |                     | TM7                                 | TM7_SC3                                             | 0                                | 0.3  | 0    | 0.2  | 0    | 0    | 0    | 0    | 0    | 0    | 0    | 0    | 0    | 0    | 0    | 0    | 0    | 0    | 0    | 0    | 0    | 0   |   |
|                     |                     |                                     | TM7_SC3-1                                           | 0                                | 0    | 0    | 0    | 0    | <    | 0    | <    | 0    | 0    | 0.1  | 0    | <    | <    | 0    | <    | 0    | 0    | 0    | 0    | 0    | 0   |   |
|                     |                     |                                     | TM7_SC3-EW055                                       | 8.1                              | 1.2  | 0    | 0.8  | 0    | 0    | 0    | 0    | <    | 0    | 0    | 0    | 0    | <    | 0    | 0    | 0    | 0    | 0    | 0    | 0    | 0   |   |
| Verrucomicrobia     | [Spartobacteria]    | [Chthoniobacteriales]               | [Chthoniobacteraceae]; Candidatus Xiphinematobacter | 0                                | 0    | 0    | 0    | 0    | 0    | 0    | 0    | 0    | 0    | 0    | 0    | 0    | 0.3  | 0    | 0.1  | 0    | 0    | 0    |      |      |     |   |
| WS6 WPS-2           |                     |                                     | 0.4                                                 | 13.0                             | 0    | 11.5 | 2.5  | 3.4  | 2.5  | 6.0  | 7.9  | 2.4  | 7.8  | 8.4  | 4.7  | 4.5  | 6.8  | 3.1  | 1.8  | 1.7  | 3.6  | 0.9  | 3.4  |      |     |   |
| WS6                 | B142                |                                     | 0                                                   | 0                                | 0    | 0    | 0.2  | <    | 0.2  | <    | 0    | 0.1  | 0.2  | 0.1  | 0.1  | <    | 0    | 0.1  | 0    | 0    | 0    | 0    | 0    |      |     |   |

**Supplementary Table 11.** Table shows the full eukaryotic community composition collapsed into higher eukaryotic taxonomic groups. Values represent the relative abundance of the 18S ASVs in percentage of the total number of sequences and collapsed on the species level. Values are rounded to one decimal place, thus “<” represents relative abundance < 0.05 and > 0.

|                |                    |                                  | Year |      |      |      |       |       |      |      |      |      |       |       |       |       |       |       |       |       |       |       |       |       |       |       |       |       |   |
|----------------|--------------------|----------------------------------|------|------|------|------|-------|-------|------|------|------|------|-------|-------|-------|-------|-------|-------|-------|-------|-------|-------|-------|-------|-------|-------|-------|-------|---|
|                |                    |                                  | 2016 |      |      |      |       |       |      |      |      |      |       |       |       |       |       |       |       |       | 2017  |       |       |       |       |       |       |       |   |
| Site           |                    |                                  | 2    | 2    | 3    | 3    | 3     | 3     | 3    | 3    | 4a   | 4a   | 4a    | 4a    | 4a    | 4a    | 4a    | 4a    | 4a    | 4a    | 4b    | 4b    | 4b    | 4b    | 4b    | 4b    | 4b    |       |   |
| Sample ID      |                    |                                  | 16-2 | 16-9 | 16-3 | 16-4 | 16-10 | 16-11 | 16-5 | 16-6 | 16-7 | 16-8 | 16-12 | 16-13 | 16-14 | 16-16 | 16-17 | 16-18 | 16-27 | 17-24 | 17-25 | 17-26 | 17-27 | 17-28 | 17-29 | 17-33 | 17-34 | 17-35 |   |
| D0             | D1                 | D2                               |      |      |      |      |       |       |      |      |      |      |       |       |       |       |       |       |       |       |       |       |       |       |       |       |       |       |   |
| Amoebozoa      | Discosea           | Flabellinia                      | 0    | 0    | 0    | 0    | 0     | 0     | 0    | 0    | 0    | 0    | 0     | 0     | 0     | 0     | 0     | 0     | 0     | 0     | 0     | 0     | 0.1   | 0     | 0     | 0     | 0     | 0     |   |
|                | Gracilipodida      | Flamella                         | 0    | 0    | 0    | 0    | 0     | 0     | <    | <    | <    | <    | 0     | <     | 0.1   | 0     | 0     | <     | 0     | 0     | 0     | 0     | 0.1   | 0     | 0     | 0     | 0     | 0     |   |
|                | Tubulinea          | Euamoebida                       | 0    | 0    | 2.8  | 0    | 0.3   | 0     | 0    | 0    | 0    | <    | <     | 0     | 0.2   | 0     | <     | 0     | 0     | 0     | 0     | 0     | 0.2   | 0     | 0     | 0     | 0     | 0     |   |
|                |                    |                                  | 0    | 0    | 0    | 0    | 0     | 0     | 0.2  | 0.5  | 0.4  | <    | 0     | <     | 0.6   | <     | <     | <     | 0     | 0     | 0     | 0     | 9.2   | 0     | 0     | <     | 0     | 0     |   |
| Archaeplastida | Chloroplastida     | Charophyta                       | 55.6 | 80.4 | 58.7 | 65.1 | 51.6  | 53.9  | 61.2 | 65.0 | 67.7 | 62.1 | 65.4  | 57.3  | 25.8  | 85.5  | 64.5  | 39.7  | 87.5  | 79.9  | 84.4  | 84.5  | 1.9   | 78.6  | 80.7  | 96.1  | 80.5  | 78.3  |   |
|                |                    | Chlorophyta                      | 0.2  | 0.3  | 7.9  | 1.6  | 14.0  | 8.4   | 3.8  | 3.1  | 2.9  | 4.3  | 0.3   | 6.5   | 9.7   | 1.1   | 2.3   | 17.5  | <     | 2.0   | 0.2   | 0.7   | 7.5   | 3.6   | 1.7   | 0.3   | 3.0   | 1.5   |   |
| Opisthokonta   | Holozoa            | Metazoa                          | <    | <    | <    | <    | <     | <     | 10.9 | 7.4  | 6.6  | 10   | <     | 1.2   | 23.9  | <     | 4.4   | 14.9  | 0     | 0     | 0.1   | <     | 56.6  | <     | <     | 0.1   | <     | 0     |   |
|                | Nucleotmyceae      | Fungi                            | 34.1 | 14.8 | 16.9 | 27.1 | 26.1  | 23.1  | 19.2 | 20.8 | 19.7 | 20.5 | 34.1  | 30.4  | 32.3  | 10.7  | 19.2  | 14.9  | 11.4  | 16.0  | 15.2  | 13.8  | 17.6  | 13.6  | 16.0  | 2.3   | 11.5  | 19.6  |   |
|                |                    | Nucleariidae and Fonticula group | <    | 0    | 0    | 0    | 0     | 0     | 0    | 0    | 0    | 0    | 0     | 0     | 0     | <     | 0     | 0     | 0     | 0     | 0     | 0     | 0     | <     | 0     | 0     | 0     | 0     | 0 |
|                |                    |                                  | 0    | 0    | 0    | 0    | 0     | 0     | 0    | 0    | 0    | 0    | 0     | 0     | 0     | 0     | 0     | 0     | 0.1   | 0     | 0     | 0     | 0     | 0.1   | 0     | 0     | 0     | 0     | 0 |
| SAR            | Alveolata          | Ciliophora                       | 1.0  | 0.4  | 1.8  | 3.1  | 0.4   | 2.4   | 0.6  | 1.0  | 0.8  | 1.2  | 0.1   | 1.0   | 3.9   | 2.2   | 8.4   | 5.3   | 0.2   | 0.4   | 0     | 0.1   | 1.8   | 0.6   | <     | 0.2   | 0.5   | 0.1   |   |
|                |                    | Dinoflagellata                   | 2.6  | 1.5  | 7.4  | 0.1  | 0.4   | 0.3   | 3.4  | 1.4  | 1.2  | 1.1  | 0.1   | 1.4   | 0.6   | 0.2   | 0.4   | 0.1   | 0     | 1.6   | 0.1   | 0.6   | 1.7   | 3.2   | 1.0   | 0.7   | 4.2   | 0.6   |   |
|                | Rhizaria           | Cercozoa                         | 6.2  | 2.5  | 4.0  | 3.0  | 7.0   | 11.9  | 0.6  | 0.7  | 0.6  | 0.6  | <     | 1.8   | 2.3   | 0.2   | 0.7   | 4.9   | 0.4   | 0.1   | <     | 0.2   | 2.3   | 0.4   | 0.4   | 0.1   | 0.2   | <     |   |
|                | Stramenopiles      | Bicosoecida                      | 0    | 0    | <    | 0    | <     | 0     | 0    | 0    | 0    | 0    | 0     | 0     | <     | 0     | 0     | 0     | 0     | 0     | 0     | 0     | 0.1   | 0     | 0     | 0     | 0     | 0     |   |
|                |                    | Labyrinthulomycetes              | 0    | 0    | 0    | 0    | 0     | 0     | 0    | 0    | 0    | 0    | 0     | 0     | 0     | 0     | 0     | 0     | 0     | 0     | 0     | 0     | 0.1   | 0     | 0     | 0     | 0     | 0     |   |
|                |                    | Ochrophyta                       | 0.1  | <    | 0.2  | <    | 0.2   | <     | 0.1  | 0.1  | 0.1  | 0.2  | <     | 0.4   | 0.6   | <     | 0.1   | 2.7   | 0.5   | <     | <     | 0.1   | 0.7   | 0.1   | 0.2   | 0.2   | 0.1   | <     |   |
|                | Peronosporomycetes | 0                                | 0    | 0.3  | 0    | <    | 0     | <     | <    | <    | <    | 0    | 0     | 0.1   | <     | 0     | 0     | 0     | 0     | 0     | 0     | 0.1   | 0     | 0     | 0     | 0     | 0     |       |   |



**Supplementary Table 12.** Table shows the fungal community composition with the taxonomic assignments of the ten most abundant ASV on the lowest possible level. The representative sequences were blasted against NCBI and the closest accession number with the respective similarity were recorded. If several hits shared the similarity one hit was chosen as an example (“e.g.”). Values represent the relative abundance of the ITS2 ASVs in percentage of the total number of sequences. Values are rounded to one decimal place, thus “<” represents relative abundance values < 0.05 and > 0.

| ASV ID                           | Taxonomic assignment                      | Year<br>Site<br>Accession number<br>(similarity) | 2016 |      |      |      |      |      |      |      |      |      |      |      |      |      |      |      |      |
|----------------------------------|-------------------------------------------|--------------------------------------------------|------|------|------|------|------|------|------|------|------|------|------|------|------|------|------|------|------|
|                                  |                                           |                                                  | 2    | 2    | 3    | 3    | 3    | 3    | 3    | 3    | 3    | 3    | 3    | 3    | 3    | 3    | 3    | 3    |      |
| 07892df564bfb39552b9a0e574361226 | Basidiomycota sp.                         | MK045389.1 (91.36%)                              | 49.7 | 42.1 | 0    | 69.7 | 30.1 | 70.7 | 48.6 | 49.8 | 45.4 | 38.0 | 52.5 | 30.4 | 17.3 | 33.0 | 32.1 | 20.5 | 75.6 |
| dd187f27730de8ee9c227cba215cb89a | Microbotryomycetes<br>sp. strain V155     | MF615028.1 (91.80%)                              | 0.3  | 1.4  | 0    | 1.0  | 0.9  | 4.5  | 6.8  | 12.7 | 4.9  | 11.9 | 1.9  | 9.1  | 7.1  | 12.1 | 11.1 | 12.5 | 0.7  |
| 0862d42a8aa9048d06af0daa70c29b5a | No blast hit (1)                          |                                                  | 0    | 0    | 0    | 0    | <    | 0    | 9.6  | 5.7  | 12.2 | 0    | 0.5  | 13.0 | 31.4 | 5.2  | 3.9  | 5.0  | 0.2  |
| eb54f47b0264c9e00e133ae90bc541c6 | No blast hit (2)                          |                                                  | 2.5  | 4.6  | 1.1  | 10.9 | 1.2  | 10.6 | 1.8  | 2.0  | 2.0  | 4.9  | 0.3  | 1.7  | 1.7  | 8.2  | 9.1  | 6.6  | 0.1  |
| 1316f0da74ff2d47e0271f6485dc52   | Peizizomycotina<br>sp./Helotiales sp. (1) | e.g., MF615085.1/<br>MF043974.1 (100%)           | 17.0 | 6.2  | 9.9  | 0.2  | 12.4 | 0.2  | 1.5  | 0.8  | 1.5  | 0.9  | 3.1  | 2.2  | 2.3  | 1.7  | 1.8  | 4.3  | 0.2  |
| e4d8c7cc2cd7be1e50beb02b1523e504 | Peizizomycotina<br>sp./Helotiales sp. (2) | e.g., MF615085.1/<br>MF043974.1 (100%)           | 13.9 | 7.9  | 8.2  | 0.3  | 15.8 | 0.1  | 1.3  | 0.8  | 1.6  | 1.1  | 2.5  | 1.9  | 2.6  | 1.6  | 1.6  | 3.0  | 0    |
| b95d68ad46eef17c47774f6c74ab71bd | Rhodotorula sp.                           | e.g., MK671639.1 (100%)                          | 0    | 0    | 0    | 0    | 0    | 0    | 2.7  | 2.4  | 2.8  | 2.9  | 1.2  | 8.9  | 13.1 | 1.0  | 6.1  | 17.3 | 0.1  |
| 84ff4cf007fda6b6514d411727fd0c44 | Herpotrichiellaceae<br>sp.                | KF636410.1 (97.30%)                              | 0    | 0    | 0    | 0    | 0    | 0    | 3.6  | 2.6  | 4.9  | 3.3  | 5.1  | 10   | 7.2  | 9.0  | 4.0  | 8.1  | 0.4  |
| c0f393e0d357cc4f61bf1a814acb82f4 |                                           |                                                  | 0    | 0    | 0    | 0    | 0    | 0    | 10.9 | 10   | 10.1 | 8.6  | 4.0  | 3.5  | 2.3  | 7.3  | 6.9  | 7.0  | 0.9  |
| d9250a2f909c0c94e6ebe43baa84f521 |                                           |                                                  | 1.4  | 1.4  | 0.8  | 2.3  | 0.9  | 1.9  | 4.2  | 0    | 4.1  | 3.5  | 8.3  | 4.7  | 2.2  | 4.0  | 4.2  | 2.3  | 2.4  |
| 549304d1b3e26af65faf1af31d0d48c6 |                                           |                                                  | 0    | 0    | 0    | 0    | 0    | 0    | 3.6  | 1.8  | 4.1  | 3.4  | 0.3  | 6.7  | 4.7  | 2.2  | 0.6  | 0.7  | 0.3  |
| d4fcbbaec77b8358282fc7e2f9a99eb4 |                                           |                                                  | 0    | 0    | 28.4 | 0    | 0    | 0    | 0    | 0    | 0    | 0    | 0    | 0    | 0    | 0    | 0    | 0    | 0    |
| f261fe44c08d54e6bcd29961c6c37e45 |                                           |                                                  | 3.4  | 1.9  | 0    | 0    | 0    | 0    | 0.4  | 1.9  | 0.7  | 0.8  | 0    | 0.3  | 0.4  | 2.1  | 7.5  | 3.8  | 0    |
| cab5746aafd00c2d8572e0958e3e9638 |                                           |                                                  | 0    | <    | 0.1  | 0.4  | 0.1  | 2.0  | 0.7  | 0.5  | 0.5  | 0.6  | 1.6  | 0.7  | 0.8  | 0    | 0.9  | 1.2  | 12.1 |
| e9da2a8a48107d128e3fb4bf1c22a35  |                                           |                                                  | 0    | 0    | 0    | 0    | 0    | 0    | 1.4  | 1.1  | 1.7  | 2.2  | 0.5  | 2.6  | 3.4  | 1.2  | 1.6  | 5.0  | 0.2  |
| 91b33e406a755eede56fd9f97651ef9e |                                           |                                                  | 0    | 0    | 19.3 | 0    | 0    | 0    | 0    | 0    | 0    | 0    | 0    | 0    | 0    | 0    | 0    | 0    | 0    |
| c5ceaed3c7dc25fc7ed25c55183f11f5 |                                           |                                                  | 4.2  | 9.5  | 0    | 0.2  | 0    | 0    | 0    | 0    | 0    | 0    | 0    | 0    | 0    | 0    | 0    | 0    | 0    |
| 3e89ecc9ab87565f807d72ec27715518 |                                           |                                                  | 0    | 0    | 0    | 0    | 0    | 0    | 0    | 0    | 0    | 12.2 | 0    | 0    | 0    | 0    | 0    | 0    | 0    |
| 6b72280905b643c0fb5974d2d77879c8 |                                           |                                                  | 0    | 0    | 8.0  | 0    | 2.4  | 0    | 0    | 0    | 0    | 0.1  | 0    | 0    | 0    | 0    | 0    | 0    | 0    |
| 9d4ff72903eb01cdc573aaf09e8394c9 |                                           |                                                  | 0    | 0    | 2.3  | 0    | 5.9  | 0    | <    | <    | 0.1  | <    | 0.1  | 0.3  | 0.2  | 0.1  | 0.1  | 0.5  | 0    |
| 95e441833de252ad845c1f5752375d9d |                                           |                                                  | 0    | 0    | 0    | 6.3  | 0    | 3.1  | 0    | 0    | 0    | 0    | 0    | 0    | 0    | 0    | 0    | 0    | 0    |
| 0d2969f56d97cef21d15f56f8bd3dd51 |                                           |                                                  | 0    | 0    | 9.3  | 0    | 0    | 0    | 0    | 0    | 0    | 0    | 0    | 0    | 0    | 0    | 0    | 0    | 0    |
| f5cfe14fb1a601ef5615d0c3715ec745 |                                           |                                                  | 0    | 0    | 0    | 0    | 9.0  | 0    | 0    | 0    | 0    | 0    | 0    | 0    | 0    | 0    | 0    | 0    | 0    |
| f8a57d6dfda711ad1a5786f3c2abda94 |                                           |                                                  | 0.2  | 0.1  | 0    | 0    | <    | <    | 0.1  | 0    | 0.1  | 0.1  | 5.5  | 0    | 0    | 0.5  | 0.1  | 0.2  | 1.9  |
| 18c811a9d8b5e888a44d72109e188857 |                                           |                                                  | 0    | 0    | 0    | 0    | 0    | 0    | 0.1  | 2.1  | 0.4  | 2.3  | 0    | 1.6  | 0.8  | <    | 0.9  | 0    | 0    |
| 8c2311ec87b85766c9910af02e43c178 |                                           |                                                  | 0    | 0    | 0.6  | 0    | 6.6  | <    | 0    | 0    | 0    | 0    | 0.1  | 0    | 0    | 0    | 0    | <    | 0    |
| 75e2fa7712d9e9c81e157e7c32d504cc |                                           |                                                  | 0    | 0    | 0    | 0    | 6.2  | 0    | 0    | 0    | 0    | 0    | 0    | 0    | 0    | 0    | 0    | 0    | 0    |
| 900939e27331f239c40d3a102f6f32f9 |                                           |                                                  | 0    | 0    | 0    | 0    | 0    | 0    | 0    | 0    | 0.1  | <    | 4.6  | 0    | 0    | 0.2  | <    | 0    | 0.1  |
| 896af8512258ac794dc03277bcc5bc76 |                                           |                                                  | 1.1  | 0.5  | 1.1  | 0.3  | 1.2  | 0    | 0    | 0    | 0    | 0    | 0.4  | 0.1  | 0    | 0    | 0.1  | 0    | 0    |
| 7b79301ea0e9678345165c745c76fe59 |                                           |                                                  | 0    | 0    | 0    | 0    | 0    | 0    | 0    | 0.1  | 0    | 0    | 3.3  | 0    | 0    | 0.2  | 0    | 0    | 0.9  |
| ea86391d31c8c4ca5059c7d399c53c47 |                                           |                                                  | 0    | 0    | 0    | 0    | 0    | 0    | 0    | 4.5  | 0    | 0    | 0    | 0    | 0    | 0    | 0    | 0    | 0    |
| f55a499dd3bf1b72aa5ca1f00e446a9a |                                           |                                                  | 0.1  | <    | <    | 0.7  | 0    | 0.2  | 0    | 0.1  | 0.2  | 0.2  | 2.0  | 0.2  | 0    | 0.4  | 0.3  | 0.1  | 0    |
| e6e295487c275c90bb0b57b13748444  |                                           |                                                  | 0.7  | 0.3  | 0.9  | 0.2  | 1.3  | 0.2  | <    | 0    | 0    | 0    | 0.3  | 0    | 0    | 0.1  | 0    | 0.1  | 0    |
| b2d815f764528856c81093e0e83860e3 |                                           |                                                  | 0    | 0    | 0    | 0    | 0    | 0    | 0.4  | 0.1  | 1.0  | 0.3  | 0    | 0    | 0    | 0.2  | 2.1  | 0    | 0    |
| 506520fbaa88ae977b968a7123313ae5 |                                           |                                                  | 0    | 0    | 0    | 0    | 0    | 0    | 0.1  | 0.1  | 0.1  | 0.1  | 0    | 0.2  | 0.1  | 0.5  | 2.5  | 0.1  | 0    |
| 1cd2c551fd1296a9ef67e047ee74c183 |                                           |                                                  | 0    | 0    | 3.2  | 0    | <    | 0    | <    | 0    | 0    | 0    | 0    | 0    | <    | 0    | 0    | 0    | 0    |
| 49da64cfc7c09efb3711c8c38d1e9614 |                                           |                                                  | 0.5  | 2.1  | 0    | 0.3  | 0    | 0.2  | 0    | 0    | 0    | 0    | 0    | 0    | 0    | 0    | 0    | 0    | 0    |
| e27312f054bc27fa83b15263bf1ced   |                                           |                                                  | 0.4  | 2.1  | 0    | 0.3  | 0    | 0.2  | 0    | 0    | 0    | 0    | 0    | 0    | 0    | 0    | 0    | 0    | 0    |
| 117de4dac3c76149f0ccc26098af7680 |                                           |                                                  | 0    | 0.1  | <    | 0.8  | 0    | 2.1  | 0    | 0    | 0    | 0    | 0    | 0    | 0    | 0    | 0    | 0    | 0    |

|                                  |     |     |     |     |     |     |     |     |     |     |     |     |     |     |     |     |     |
|----------------------------------|-----|-----|-----|-----|-----|-----|-----|-----|-----|-----|-----|-----|-----|-----|-----|-----|-----|
| 901b96de056ba115dd4bb2f48f135ede | 0   | 0   | 0   | 0   | 0.1 | 0   | 0.2 | 0.2 | 0.2 | 0.3 | 0   | 0.3 | 0.6 | 0.2 | 0.3 | 0.7 | 0   |
| a352b73df462a7cd1d641eadc54c803a | 0.5 | 2.3 | 0   | 0.1 | <   | 0   | 0   | 0   | 0   | 0   | 0   | 0   | 0   | 0   | 0   | 0   | 0   |
| 7528e837bba42e5d7e6dbefa03f32cd6 | 0   | 2.9 | 0   | 0   | 0   | 0   | 0   | 0   | 0   | 0   | 0   | 0   | 0   | 0   | 0   | 0   | 0   |
| 13a3e4c112e47f0ba6a4a7d9a4fea0e8 | 0.3 | 1.2 | 0.1 | 0.2 | 0   | 0.5 | 0   | 0   | <   | <   | 0.3 | 0.1 | 0   | 0   | 0.1 | 0   | <   |
| 16588c840792e0c4d1ed78bf8066e621 | 0   | 0   | 0   | 0   | 0   | 0   | 0   | 0   | 0   | 0   | 0   | 0   | 0   | 1.6 | 0   | 0   | 1.1 |
| 2ca1fdf180e78c761f651c5fcca72df  | 0.6 | 2.0 | 0   | 0.1 | 0.1 | 0   | 0   | 0   | 0   | 0   | 0   | 0   | 0   | 0   | 0   | 0   | 0   |
| 58618f5d53426428f663886e4f4a4d7d | 0   | 0   | 0   | 2.5 | 0.1 | 0   | 0   | 0   | 0   | 0   | 0   | 0   | 0   | 0   | 0   | 0   | 0   |
| 46245d37bc4b998666f3d9800f9862fe | 0.2 | 2.3 | 0   | 0   | 0   | 0   | 0   | 0   | 0   | 0   | 0   | 0   | 0   | 0   | 0   | 0   | 0   |
| d2dfc392d3995163972b46f5d6be640e | 0.6 | 1.8 | 0   | 0   | 0   | 0   | 0   | 0   | 0   | 0   | 0   | 0   | 0   | 0   | 0   | 0   | 0   |
| 382e5d645369e294afa4f98c9094ee39 | 0   | 0.5 | 0   | 0.8 | 0   | 0.6 | <   | <   | <   | <   | 0   | 0.2 | 0.1 | 0   | 0.1 | 0   | 0   |
| 616115979f7af934de68e045e5dfbcb  | 0   | 0   | 0   | 0   | 0   | 0   | 0   | 0   | 0   | 0   | 0   | 0   | 0   | 2.2 | 0   | 0   | 0   |
| Other                            | 2.6 | 6.6 | 6.5 | 2.4 | 5.7 | 2.9 | 1.5 | 0.6 | 1.1 | 2.3 | 1.5 | 1.5 | 2.0 | 5.2 | 1.7 | 1.0 | 2.6 |

**Supplementary Table 13.** Table shows the full algal community composition with the taxonomic assignments of each ASV on the lowest possible level. Values represent the relative abundance of the 18S ASVs in percentage of the total number of sequences. All ASVs were blasted against NCBI and the closest accession number with the respective similarity were recorded. If several hits shared the similarity one hit was chosen as an example (“e.g.”). Values are rounded to one decimal place, hence “<” represents relative abundance < 0.05 and > 0.

| Year                               |                               | 2016 |      |      |      |       |       |      |      |      |      |       |       |       |       |       | 2017  |       |       |       |       |       |       |      |       |       |
|------------------------------------|-------------------------------|------|------|------|------|-------|-------|------|------|------|------|-------|-------|-------|-------|-------|-------|-------|-------|-------|-------|-------|-------|------|-------|-------|
| Site                               |                               | 2    | 2    | 3    | 3    | 3     | 3     | 4a   | 4a   | 4a   | 4a   | 4a    | 4a    | 4a    | 4a    | 4a    | 4a    | 4b    | 4b    | 4b    | 4b    | 4b    | 4b    | 4b   | 4b    |       |
| Sample ID                          |                               | 16-2 | 16-9 | 16-3 | 16-4 | 16-10 | 16-11 | 16-5 | 16-6 | 16-7 | 16-8 | 16-12 | 16-13 | 16-14 | 16-16 | 16-17 | 16-18 | 16-27 | 17-24 | 17-25 | 17-26 | 17-28 | 17-29 | 17-3 | 17-34 | 17-35 |
| Taxonomic assignment               | Accession number (similarity) |      |      |      |      |       |       |      |      |      |      |       |       |       |       |       |       |       |       |       |       |       |       |      |       |       |
| <i>Ancylonema nordenskiöldii</i>   | AF514397.2 (100%)             | 31.5 | 8.7  | 6.7  | 12.1 | 12.5  | 12.2  | 59.9 | 69.4 | 70.4 | 75.5 | 51.1  | 31.0  | 37.3  | 91.2  | 37.5  | 46.9  | 93.0  | 65.3  | 82.9  | 55.0  | 55.5  | 84.1  | 96.5 | 60.6  | 47.4  |
| <i>Ancylonema nordenskiöldii</i>   | AF514397.2 (98.8%)            | 0    | 0    | 0.1  | <    | <     | <     | <    | <    | 0.1  | <    | 0.2   | <     | <     | <     | 0.1   | <     | <     | 0     | <     | 0     | 0     | <     | 0    | 0     | <     |
| <i>Ancylonema nordenskiöldii</i> * | AF514397.2 (99.6%)            | 66.7 | 89.4 | 79.6 | 84.4 | 65.0  | 73.6  | 32.6 | 24.4 | 24.1 | 16.3 | 47.5  | 57.3  | 32.4  | 6.4   | 58.2  | 18.6  | 5.8   | 30.5  | 16.0  | 42.2  | 38.8  | 12.5  | 2.2  | 34.3  | 48.8  |
| <i>Ancylonema nordenskiöldii</i>   | AF514397.2 (100%)             | 0    | 0    | 0    | 0    | 0     | 0     | 0    | 0    | 0.1  | 0.1  | 0.1   | 0     | 0     | 0.2   | 0     | 0     | 0.2   | 0.2   | 0.2   | 0     | 0     | 0.3   | 0    | 0.2   | 0.1   |
| <i>Ancylonema nordenskiöldii</i>   | AF514397.2 (99.1%)            | 0    | 0    | 0.2  | 0.1  | 0.3   | 0.1   | 0    | 0    | 0    | 0    | 0     | 0.2   | 0     | 0     | 0     | 0     | 0     | 0     | 0     | 0.2   | 0.1   | 0     | 0    | 0.1   | 0.2   |
| <i>Ancylonema nordenskiöldii</i>   | AF514397.2 (99.7%)            | 0    | 0    | 0    | 0    | 0     | 0     | 0.5  | 0.6  | 0.6  | 0.5  | 0     | 0.2   | 0.3   | 0.1   | 0.3   | 0.5   | 0     | 0.4   | 0.2   | 0.3   | 0.3   | 0.4   | 0    | 0.3   | 0.4   |
| <i>Ancylonema nordenskiöldii</i>   | AF514397.2 (98.1%)            | 0    | 0    | 0.1  | <    | 0.1   | <     | 0    | 0    | 0    | 0    | 0     | 0.1   | <     | 0     | <     | 0     | 0     | <     | 0     | 0.2   | 0.1   | 0     | 0    | 0.1   | 0.1   |
| <i>Ancylonema nordenskiöldii</i>   | AF514397.2 (99.1%)            | 0    | 0    | <    | <    | <     | <     | <    | 0.1  | <    | 0.1  | 0.2   | <     | <     | <     | 0.1   | <     | <     | 0     | 0     | 0     | 0     | <     | <    | 0     | <     |
| <i>Ancylonema nordenskiöldii</i>   | AF514397.2 (99.4%)            | 0    | 0    | 0    | 0    | 0.4   | 0     | 0    | 0    | 0    | 0    | 0     | 0     | 0     | 0     | 0     | 0     | 0     | 0.1   | 0     | 0.4   | 0.3   | 0     | 0    | 0.3   | 0.3   |
| <i>Ancylonema nordenskiöldii</i>   | AF514397.2 (99.1%)            | 0.1  | 0.2  | 0.1  | 0.2  | 0     | 0.1   | 0    | 0    | 0    | 0    | 0     | 0     | 0     | 0     | 0     | 0     | 0     | 0     | 0     | 0     | 0     | 0     | 0    | 0     | 0     |
| <i>Ancylonema nordenskiöldii</i>   | AF514397.2 (99.7%)            | 0    | 0    | 0    | 0    | 0     | 0     | 0.1  | 0.1  | 0.1  | 0.1  | 0.2   | 0     | 0     | 0.6   | 0     | 0     | 0.2   | 0.1   | 0.2   | 0     | 0     | 0.2   | 0.4  | 0.1   | 0.1   |
| <i>Ancylonema nordenskiöldii</i>   | AF514397.2 (99.4%)            | 0.4  | 0.4  | 0.3  | 0.4  | 0.3   | 0.4   | 0    | 0    | 0    | 0    | 0.1   | 0.2   | 0     | 0     | 0.2   | 0     | 0     | 0.1   | 0     | 0     | 0     | 0     | 0    | 0.1   | 0.1   |
| <i>Ancylonema nordenskiöldii</i>   | AF514397.2 (99.7%)            | 0.1  | <    | <    | 0    | 0     | 0     | 0.1  | 0.1  | 0.1  | 0    | <     | 0.1   | 0     | 0.2   | <     | 0     | 0.2   | 0.1   | 0     | 0     | 0     | 0.1   | 0.2  | 0.1   | 0.1   |
| <i>Ancylonema nordenskiöldii</i>   | AF514397.2 (99.4%)            | 0.1  | 0.2  | 0.1  | 0    | 0     | 0     | 0.1  | <    | <    | 0    | 0.1   | 0.1   | 0     | <     | 0.1   | 0     | <     | 0.1   | 0     | 0     | 0     | <     | <    | 0.1   | 0.1   |
| <i>Ancylonema nordenskiöldii</i>   | AF514397.2 (99.4%)            | 0.5  | 0.6  | 0    | 0    | 0     | 0     | 0    | 0    | 0    | 0    | 0     | 0     | 0     | 0     | 0     | 0     | 0     | 0     | 0     | 0     | 0     | 0     | 0    | 0     | 0     |
| <i>Ancylonema nordenskiöldii</i>   | AF514397.2 (98.5%)            | 0    | 0    | 0.3  | 0.2  | 0.3   | 0.2   | 0    | 0    | 0    | 0    | 0     | 0.2   | 0.1   | 0     | <     | 0     | 0     | 0.1   | 0     | 0.2   | 0.1   | 0     | 0    | 0.1   | 0.1   |
| <i>Ancylonema nordenskiöldii</i>   | AJ579339.1 (99.1%)            | 0    | 0    | 0    | 0    | 0     | 0     | 0.3  | 0.3  | 0.3  | 0.3  | 0     | 0     | 0.2   | 0     | 0     | 0.3   | 0     | 0.4   | 0     | 0.3   | 0.2   | 0.2   | 0    | 0     | 0.3   |
| <i>Botrydiopsis constricta</i>     | AJ579339.1 (100%)             | 0    | 0    | 0    | 0    | 0     | 0     | 0    | 0    | 0    | 0    | 0     | 0     | 0     | 0     | 0     | 3.7   | 0     | 0     | 0     | 0     | 0     | 0     | 0    | 0     | 0     |
| <i>Chlainomonas</i> sp.            | e.g., MF803745.1 (99.1%)      | 0.1  | 0.2  | 0.1  | 0.6  | 0.2   | 1.5   | 2.2  | 2.0  | 1.5  | 3.4  | 0.1   | 2.3   | 0.6   | 0.5   | 2.1   | 0.5   | <     | 2.3   | 0.2   | 0.7   | 3.5   | 1.2   | 0    | 3.3   | 1.6   |
| <i>Chloroidum</i> sp.              | MH807079.1 (100%)             | 0    | 0    | 0    | 0    | 0     | 0     | 0    | 0    | 0    | 0    | 0     | 0     | 0     | 0     | 0     | 1.8   | 0     | 0     | 0     | 0     | 0     | 0     | 0    | 0     | 0     |
| <i>Chloromonas</i> spp.            | Several (100%)                | 0    | 0    | 0    | 0.1  | 0     | 0.5   | 0    | 0    | 0    | 0    | 0     | 0     | 0     | 0     | 0     | 4.9   | 0     | 0     | 0     | 0     | <     | 0     | 0    | <     | 0     |
| <i>Chloromonas</i> spp.            | Several (100%)                | 0    | <    | <    | <    | 0     | 0.2   | 0    | 0    | 0    | 0    | 0     | 0     | 0     | 0     | 0     | 1.7   | 0     | 0     | 0     | 0     | 0     | 0     | 0    | <     | 0     |
| <i>Chloromonas</i> spp.            | e.g., AB906350.1 (99.4%)      | 0    | 0    | 0    | 0    | 0     | 0     | 0    | 0    | 0    | 0    | 0     | 0     | 0     | 0     | 0     | 1.3   | 0     | 0     | 0     | 0     | 0     | 0     | 0    | 0     | 0     |



## Supplementary Figures

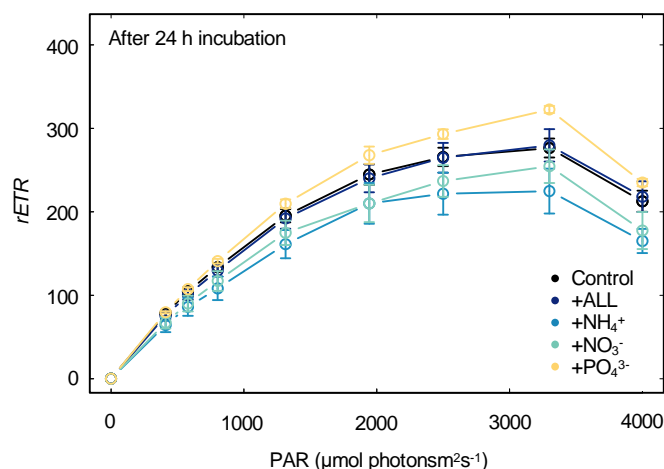

**Supplementary Figure 1.** Relative electron transport rates ( $rETR$ ) measured during rapid light curves (RLCs), following a 24 h incubation. Plot shows mean  $\pm$  standard error,  $n=4$ .

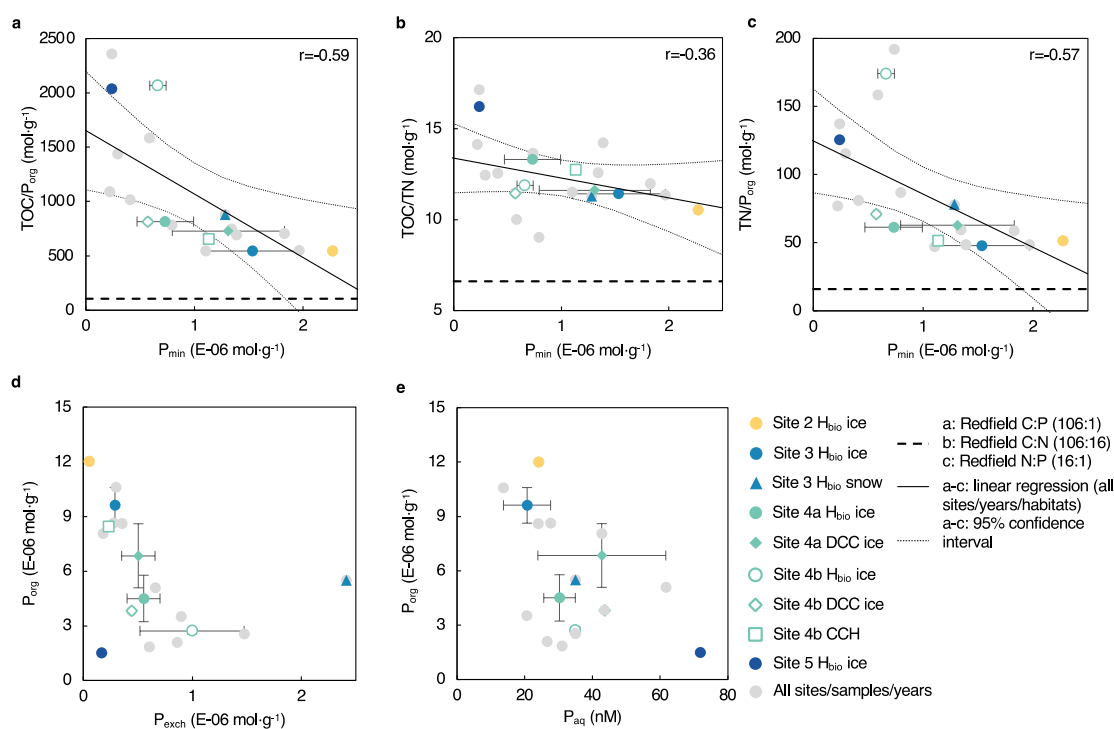

**Supplementary Figure 2.**  $P_{min}$  concentration in particulates plotted against a) TOC: $P_{org}$ , b) TOC:TN, and c) TN: $P_{org}$ . Linear regression and  $r$ -values (Pearson's product-moment correlation) correspond to all data points from all sites (grey dots). Concentrations of  $P_{org}$  in the particulate solids compared to d) solid phase  $P_{exch}$  and e) aqueous  $P$ . Colored points: mean values for different sites, habitats and years,  $\pm$ SE (2016: solid fill; 2017: white-fill). In a-c: thin dashed lines: 95% confidence interval; thick dotted line indicating the respective Redfield nutrient ratio. In all plots: site 2  $H_{bio}$  ice  $n=1$ ; Site 3  $H_{bio}$  ice  $n=2$ ; Site 3  $H_{bio}$  snow  $n=1$ ; Site 4a  $H_{bio}$  ice  $n=5$ ; Site 4a DCC ice  $n=2$ ; Site 4b  $H_{bio}$  ice  $n=2$ ; Site 4b DCC ice  $n=1$ ; Site 4b CCH  $n=1$ ; Site 5  $H_{bio}$  ice  $n=1$ .

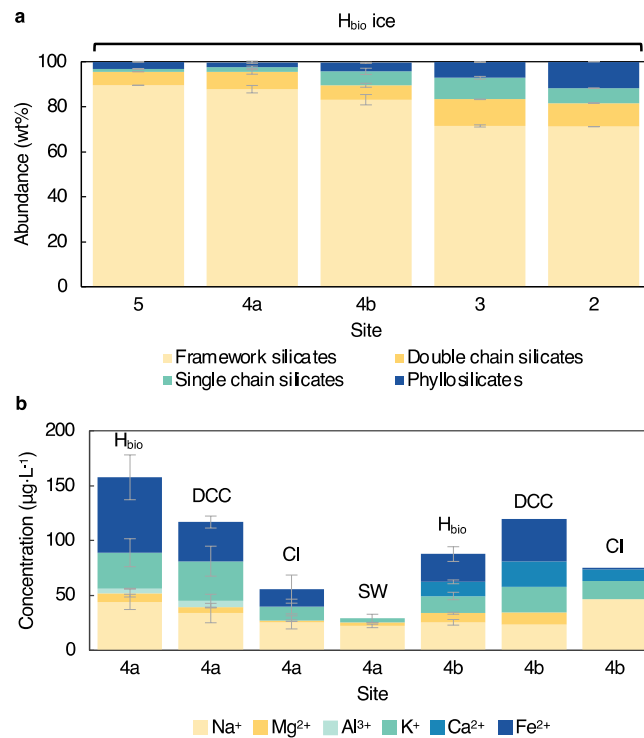

**Supplementary Figure 3.** a) structural mineral class abundances in high algal biomass ice (H<sub>bio</sub>) ice across the ablation zone, and b) major cation concentrations in meltwater from the H<sub>bio</sub> ice, dispersed cryoconite (DCC), clean ice (CI), and stream water (SW) collected in 2016 (4a) and 2017 (4b). Plot shows mean ± standard error. In a) site 5 n=1; site 4a n=5; site 4b n=4; site 3 n=2; site 2 n=1. In b) 2016: H<sub>bio</sub>: n=5; DCC: n=3; CI: n=3; SW: n=2 and 2017: H<sub>bio</sub>: n=3; DCC: n=1; CI: n=1.

### Supplementary References

- 1 Williamson, C. *et al.* Algal photophysiology drives darkening and melt of the Greenland Ice Sheet. *Proc. Natl. Acad. Sci.* **117**, 5694-5705 (2020).
- 2 Montagnes, D. J. S., Berges, J. A., Harrison, P. J. & Taylor, F. J. R. Estimating carbon, nitrogen, protein, and chlorophyll a from volume in marine phytoplankton. *Limnol. Oceanogr.* **39**, 1044-1060 (1994).
- 3 Nicholes, M. J. *et al.* Bacterial Dynamics in Supraglacial Habitats of the Greenland Ice Sheet. *Front. Microbiol.* **10** (2019).
- 4 Bratbak, G. & Dundas, I. Bacterial dry matter content and biomass estimations. *Appl Environ Microbiol* **48**, 755-757 (1984).
- 5 Rudnick, R. L. & Gao, S. in *Treatise on Geochemistry, Volume 3: The Crust* Vol. 3 (eds R.L. Rudnick, H.D. Holland, & K.K. Turekian) 1-64 (Elsevier, 2003).
- 6 Ferrat, M. *et al.* Improved provenance tracing of Asian dust sources using rare earth elements and selected trace elements for palaeomonsoon studies on the eastern Tibetan Plateau. *Geochim. Cosmochim. Acta* **75**, 6374-6399 (2011).
- 7 van der Does, M., Pourmand, A., Sharifi, A. & Stuut, J.-B. W. North African mineral dust across the tropical Atlantic Ocean: Insights from dust particle size, radiogenic Sr-Nd-Hf isotopes and rare earth elements (REE). *Aeolian Res.* **33**, 106-116 (2018).
- 8 Tepe, N. & Bau, M. Distribution of rare earth elements and other high field strength elements in glacial meltwaters and sediments from the western Greenland Ice Sheet:

- Evidence for different sources of particles and nanoparticles. *Chem. Geol.* **412**, 59-68 (2015).
- 9 Wientjes, I. G. M., Van de Wal, R. S. W., Reichert, G. J., Sluijs, A. & Oerlemans, J. Dust from the dark region in the western ablation zone of the Greenland ice sheet. *Cryosphere* **5**, 589-601 (2011).
